# Supplementary material for: Extension of the D3 and D4 London dispersion corrections to the full actinides series
Source: Royal Society of Chemistry journal article supplement (doi:10.1039/d4cp01514b), 2024-01-01
Supplement: d4cp01514b1.pdf [file d4cp01514b1.pdf]

## Supplementary Information:

# Extension of the D3 and D4 London Dispersion Corrections to the full Actinide Series

Lukas Wittmann,<sup>a‡</sup> Igor Gordiy,<sup>a‡</sup> Marvin Friede,<sup>a‡</sup> Benjamin Helmich-Paris,<sup>b</sup> Stefan Grimme,<sup>a</sup> Andreas Hansen<sup>\*a</sup>, and Markus Bursch<sup>\*b,c</sup>

<sup>a</sup> Mulliken Center for Theoretical Chemistry, Universität Bonn, Berlingstr. 4, 53115 Bonn, Germany.

<sup>b</sup> Max-Planck-Institut für Kohlenforschung, Kaiser-Wilhelm-Platz 1, 45470 Mülheim an der Ruhr, Germany.

<sup>c</sup> FACCTs GmbH, 50677, Köln, Germany.

\* E-mail: hansen@thch.uni-bonn.de, bursch@kofo.mpg.de.

‡ These Authors contributed equally.

# Contents

|          |                                                                          |           |
|----------|--------------------------------------------------------------------------|-----------|
| <b>A</b> | <b>Definition of Statistical Measures</b>                                | <b>4</b>  |
| <b>B</b> | <b>DFT-D3</b>                                                            | <b>5</b>  |
| B.1      | $C_6$ Coefficients                                                       | 5         |
| B.2      | $\frac{\langle r_A^4 \rangle}{\langle r_A^2 \rangle}$ Expectation Values | 5         |
| B.3      | Covalent Radii                                                           | 5         |
| B.4      | Van-der-Waals Radii                                                      | 6         |
| B.4.1    | Actinium                                                                 | 6         |
| B.4.2    | Thorium                                                                  | 6         |
| B.4.3    | Protactinium                                                             | 7         |
| B.4.4    | Uranium                                                                  | 7         |
| B.4.5    | Neptunium                                                                | 8         |
| B.4.6    | Plutonium                                                                | 8         |
| B.4.7    | Americium                                                                | 9         |
| B.4.8    | Curium                                                                   | 9         |
| B.4.9    | Berkelium                                                                | 10        |
| B.4.10   | Californium                                                              | 10        |
| B.4.11   | Einsteinium                                                              | 11        |
| B.4.12   | Fermium                                                                  | 11        |
| B.4.13   | Mendelevium                                                              | 12        |
| B.4.14   | Nobelium                                                                 | 12        |
| B.4.15   | Lawrencium                                                               | 13        |
| <b>C</b> | <b>DFT-D4</b>                                                            | <b>14</b> |
| C.1      | Chemical Hardnesses                                                      | 14        |
| C.2      | Electronegativities                                                      | 14        |
| C.3      | Reference Systems                                                        | 14        |
| C.4      | Reference Data                                                           | 15        |
| C.4.1    | Actinium                                                                 | 15        |
| C.4.2    | Thorium                                                                  | 17        |
| C.4.3    | Protactinium                                                             | 18        |
| C.4.4    | Uranium                                                                  | 19        |
| C.4.5    | Neptunium                                                                | 21        |
| C.4.6    | Plutonium                                                                | 23        |
| C.4.7    | Americium                                                                | 24        |
| C.4.8    | Curium                                                                   | 26        |
| C.4.9    | Berkelium                                                                | 28        |
| C.4.10   | Californium                                                              | 29        |
| C.4.11   | Einsteinium                                                              | 30        |
| C.4.12   | Fermium                                                                  | 32        |
| C.4.13   | Mendelevium                                                              | 34        |
| C.4.14   | Nobelium                                                                 | 35        |
| C.4.15   | Lawrencium                                                               | 37        |

**D EEQ 39**  
D.1 AcQM . . . . . 39  
D.2 Loss Function . . . . . 39  
D.3 Parameters . . . . . 39

**E Relativistic effects 40**  
E.1 Geometries . . . . . 40  
E.2 Dynamic Purely-Imaginary Frequency Polarizabilities . . . . . 41

**F Mindless Structures in the AcQM 42**

# A Definition of Statistical Measures

The error  $e$  for a given interaction  $i$  is given by the difference between the actual method and a reference.

$$e_i = \text{method}_i - \text{reference}_i \quad (1)$$

**Mean Error (ME):** Mean of the signed error,  $n$  corresponds to the number of data points of the respective set.

$$\text{ME} = \frac{1}{n} \sum_{i=1}^n e_i \equiv \bar{e} \quad (2)$$

**Mean Absolute Error (MAE):**

$$\text{MAE} = \frac{1}{n} \sum_{i=1}^n |e_i| \quad (3)$$

**Root Mean Square Error (RMSE):**

$$\text{RMSE} = \sqrt{\frac{1}{n} \sum_{i=1}^n (e_i)^2} \quad (4)$$

**Standard Deviation (SD):** The standard deviation is defined using Bessel's correction.

$$\text{SD} = \sqrt{\frac{1}{n-1} \sum_{i=1}^n (e_i - \bar{e})^2} \quad (5)$$

**Largest Absolute Error (EMAX):** Largest and smallest (absolute) error of all  $n$  interactions  $i$  of a given set.

$$\text{EMAX} = \max(|\{e_i\}|) \quad i = \{1, 2, \dots, n\} \quad (6)$$

## B DFT-D3

### B.1 $C_6$ Coefficients

The pair-wise  $C_6^{AB}$  coefficients can be obtained with the data from Sec. C.4 using the following modified Casimir-Polder expression.

$$C_{6,\text{ref}}^{AB}(\text{CN}^A, \text{CN}^B) = \frac{3}{\pi} \int_0^\infty \frac{1}{m} \left[ \alpha^{A_m H_n}(i\omega^I) - \frac{n}{2} \alpha^{H_2}(i\omega^I) \right] \times \frac{1}{k} \left[ \alpha^{B_k H_l}(i\omega^I) - \frac{l}{2} \alpha^{H_2}(i\omega^I) \right] d\omega \quad (7)$$

### B.2 $\frac{\langle r_A^4 \rangle}{\langle r_A^2 \rangle}$ Expectation Values

$\langle r_A^4 \rangle$  and  $\langle r_A^2 \rangle$  are multipole-type expectation values derived from atomic densities.

$$\frac{\langle r_{\text{Ac..Lr}}^4 \rangle}{\langle r_{\text{Ac..Lr}}^2 \rangle} = \{19.1885, 15.8542, 16.1305, 15.6161, 15.1226, 16.1576, 14.6510, 14.7178, 13.9108, 13.5623, 13.2326, 12.9189, 12.6133, 12.3142, 14.8326\}$$

### B.3 Covalent Radii

The following covalent radii are given in Bohr.

$$r_{\text{cov}}^{\text{Ac..Lr}} = \{1.67, 1.58, 1.52, 1.53, 1.54, 1.55, 1.49, 1.49, 1.51, 1.51, 1.48, 1.50, 1.56, 1.58, 1.45\}$$

## B.4 Van-der-Waals Radii

The following pair-wise van-der-Waals radii are given in Bohr.

### B.4.1 Actinium

$$r_{\text{vdw}}^{\text{Ac}-\{\text{H}..\text{He}\}} = \{2.8428, 3.0429\}$$

$$r_{\text{vdw}}^{\text{Ac}-\{\text{Li}..\text{Ne}\}} = \{4.1000, 3.7286, 3.4857, 3.4572, 3.4000, 3.2857, 3.3000, 3.3429\}$$

$$r_{\text{vdw}}^{\text{Ac}-\{\text{Na}..\text{Ar}\}} = \{4.3857, 4.1715, 4.0000, 3.8714, 3.9571, 3.8428, 3.8000, 3.7572\}$$

$$r_{\text{vdw}}^{\text{Ac}-\{\text{K}..\text{Kr}\}} = \{4.9000, 4.5857, 4.2857, 4.1286, 4.1143, 3.9571, 3.9143, 3.8714, 3.8143, 3.8000, 3.8286, 3.9428, 3.9857, 3.9428, 4.0286, 3.9571, 4.0143, 4.0571\}$$

$$r_{\text{vdw}}^{\text{Ac}-\{\text{Rb}..\text{Xe}\}} = \{5.0857, 4.7714, 4.4857, 4.3714, 4.2714, 4.1572, 4.0286, 4.0000, 4.0000, 3.9286, 4.0286, 4.1429, 4.2143, 4.1857, 4.1857, 4.1429, 4.2714, 4.2571\}$$

$$r_{\text{vdw}}^{\text{Ac}-\{\text{Cs}..\text{Rn}\}} = \{5.3714, 4.9000, 4.7000, 4.4857, 4.6428, 4.6286, 4.6143, 4.6000, 4.5429, 4.5572, 4.5429, 4.5286, 4.5143, 4.5143, 4.5000, 4.5714, 4.4714, 4.3429, 4.2571, 4.1429, 4.0714, 4.0429, 3.9714, 3.9857, 4.0000, 4.2714, 4.2428, 4.2428, 4.3286, 4.2571, 4.3571, 4.4143\}$$

$$r_{\text{vdw}}^{\text{Ac}-\{\text{Fr}..\text{Rn}\}} = \{5.2572, 4.9714, 4.7714, 4.6428, 4.5572, 4.5714, 4.5857, 4.6000, 4.5143, 4.5143, 4.5429, 4.5429, 4.5000, 4.5286, 4.6143, 4.6428, 4.4572\}$$

### B.4.2 Thorium

$$r_{\text{vdw}}^{\text{Th}-\{\text{H}..\text{He}\}} = \{2.7143, 2.9143\}$$

$$r_{\text{vdw}}^{\text{Th}-\{\text{Li}..\text{Ne}\}} = \{3.9714, 3.6000, 3.3572, 3.3286, 3.2714, 3.1571, 3.1714, 3.2143\}$$

$$r_{\text{vdw}}^{\text{Th}-\{\text{Na}..\text{Ar}\}} = \{4.2571, 4.0429, 3.8714, 3.7429, 3.8286, 3.7143, 3.6714, 3.6286\}$$

$$r_{\text{vdw}}^{\text{Th}-\{\text{K}..\text{Kr}\}} = \{4.7714, 4.4572, 4.1572, 4.0000, 3.9857, 3.8286, 3.7857, 3.7429, 3.6857, 3.6714, 3.7000, 3.8143, 3.8571, 3.8143, 3.9000, 3.8286, 3.8857, 3.9286\}$$

$$r_{\text{vdw}}^{\text{Th}-\{\text{Rb}..\text{Xe}\}} = \{4.9571, 4.6428, 4.3571, 4.2428, 4.1429, 4.0286, 3.9000, 3.8714, 3.8714, 3.8000, 3.9000, 4.0143, 4.0857, 4.0571, 4.0571, 4.0143, 4.1429, 4.1286\}$$

$$r_{\text{vdw}}^{\text{Th}-\{\text{Cs}..\text{Rn}\}} = \{5.2429, 4.7714, 4.5714, 4.3571, 4.5143, 4.5000, 4.4857, 4.4714, 4.4143, 4.4286, 4.4143, 4.4000, 4.3857, 4.3857, 4.3714, 4.4429, 4.3429, 4.2143, 4.1286, 4.0143, 3.9428, 3.9143, 3.8428, 3.8571, 3.8714, 4.1429, 4.1143, 4.1143, 4.2000, 4.1286, 4.2285, 4.2857\}$$

$$r_{\text{vdw}}^{\text{Th}-\{\text{Fr}..\text{Rn}\}} = \{5.1286, 4.8429, 4.6428, 4.5143, 4.4286, 4.4429, 4.4572, 4.4714, 4.3857, 4.3857, 4.4143, 4.4143, 4.3714, 4.4000, 4.4857, 4.5143, 4.3286\}$$

### B.4.3 Protactinium

$$r_{\text{vdw}}^{\text{Pa}\{-\text{H}..\text{He}\}} = \{2.6286, 2.8286\}$$

$$r_{\text{vdw}}^{\text{Pa}\{-\text{Li}..\text{Ne}\}} = \{3.8857, 3.5143, 3.2714, 3.2429, 3.1857, 3.0715, 3.0857, 3.1285\}$$

$$r_{\text{vdw}}^{\text{Pa}\{-\text{Na}..\text{Ar}\}} = \{4.1715, 3.9571, 3.7857, 3.6571, 3.7429, 3.6286, 3.5857, 3.5428\}$$

$$r_{\text{vdw}}^{\text{Pa}\{-\text{K}..\text{Kr}\}} = \{4.6857, 4.3714, 4.0714, 3.9143, 3.9000, 3.7429, 3.7000, 3.6571, 3.6000, 3.5857, 3.6143, 3.7286, 3.7714, 3.7286, 3.8143, 3.7429, 3.8000, 3.8428\}$$

$$r_{\text{vdw}}^{\text{Pa}\{-\text{Rb}..\text{Xe}\}} = \{4.8714, 4.5572, 4.2714, 4.1572, 4.0571, 3.9428, 3.8143, 3.7857, 3.7857, 3.7143, 3.8143, 3.9286, 4.0000, 3.9714, 3.9714, 3.9286, 4.0571, 4.0429\}$$

$$r_{\text{vdw}}^{\text{Pa}\{-\text{Cs}..\text{Rn}\}} = \{5.1571, 4.6857, 4.4857, 4.2714, 4.4286, 4.4143, 4.4000, 4.3857, 4.3286, 4.3429, 4.3286, 4.3143, 4.3000, 4.3000, 4.2857, 4.3571, 4.2571, 4.1286, 4.0429, 3.9286, 3.8571, 3.8286, 3.7572, 3.7714, 3.7857, 4.0571, 4.0286, 4.0286, 4.1143, 4.0429, 4.1429, 4.2000\}$$

$$r_{\text{vdw}}^{\text{Pa}\{-\text{Fr}..\text{Rn}\}} = \{5.0428, 4.7571, 4.5572, 4.4286, 4.3429, 4.3571, 4.3714, 4.3857, 4.3000, 4.3000, 4.3286, 4.3286, 4.2857, 4.3143, 4.4000, 4.4286, 4.2428\}$$

### B.4.4 Uranium

$$r_{\text{vdw}}^{\text{U}\{-\text{H}..\text{He}\}} = \{2.6429, 2.8428\}$$

$$r_{\text{vdw}}^{\text{U}\{-\text{Li}..\text{Ne}\}} = \{3.9000, 3.5286, 3.2857, 3.2571, 3.2000, 3.0857, 3.1000, 3.1428\}$$

$$r_{\text{vdw}}^{\text{U}\{-\text{Na}..\text{Ar}\}} = \{4.1857, 3.9714, 3.8000, 3.6714, 3.7572, 3.6429, 3.6000, 3.5571\}$$

$$r_{\text{vdw}}^{\text{U}\{-\text{K}..\text{Kr}\}} = \{4.7000, 4.3857, 4.0857, 3.9286, 3.9143, 3.7572, 3.7143, 3.6714, 3.6143, 3.6000, 3.6286, 3.7429, 3.7857, 3.7429, 3.8286, 3.7572, 3.8143, 3.8571\}$$

$$r_{\text{vdw}}^{\text{U}\{-\text{Rb}..\text{Xe}\}} = \{4.8857, 4.5714, 4.2857, 4.1715, 4.0714, 3.9571, 3.8286, 3.8000, 3.8000, 3.7286, 3.8286, 3.9428, 4.0143, 3.9857, 3.9857, 3.9428, 4.0714, 4.0571\}$$

$$r_{\text{vdw}}^{\text{U}\{-\text{Cs}..\text{Rn}\}} = \{5.1714, 4.7000, 4.5000, 4.2857, 4.4429, 4.4286, 4.4143, 4.4000, 4.3429, 4.3571, 4.3429, 4.3286, 4.3143, 4.3143, 4.3000, 4.3714, 4.2714, 4.1429, 4.0571, 3.9428, 3.8714, 3.8428, 3.7714, 3.7857, 3.8000, 4.0714, 4.0429, 4.0429, 4.1286, 4.0571, 4.1572, 4.2143\}$$

$$r_{\text{vdw}}^{\text{U}\{-\text{Fr}..\text{Rn}\}} = \{5.0571, 4.7714, 4.5714, 4.4429, 4.3571, 4.3714, 4.3857, 4.4000, 4.3143, 4.3143, 4.3429, 4.3429, 4.3000, 4.3286, 4.4143, 4.4429, 4.2571\}$$

## B.4.5 Neptunium

$$r_{\text{vdw}}^{\text{Np}-\{\text{H}..\text{He}\}} = \{2.6572, 2.8571\}$$

$$r_{\text{vdw}}^{\text{Np}-\{\text{Li}..\text{Ne}\}} = \{3.9143, 3.5428, 3.3000, 3.2714, 3.2143, 3.1000, 3.1143, 3.1571\}$$

$$r_{\text{vdw}}^{\text{Np}-\{\text{Na}..\text{Ar}\}} = \{4.2000, 3.9857, 3.8143, 3.6857, 3.7714, 3.6571, 3.6143, 3.5714\}$$

$$r_{\text{vdw}}^{\text{Np}-\{\text{K}..\text{Kr}\}} = \{4.7143, 4.4000, 4.1000, 3.9428, 3.9286, 3.7714, 3.7286, 3.6857, 3.6286, 3.6143, 3.6429, 3.7572, 3.8000, 3.7572, 3.8428, 3.7714, 3.8286, 3.8714\}$$

$$r_{\text{vdw}}^{\text{Np}-\{\text{Rb}..\text{Xe}\}} = \{4.9000, 4.5857, 4.3000, 4.1857, 4.0857, 3.9714, 3.8428, 3.8143, 3.8143, 3.7429, 3.8428, 3.9571, 4.0286, 4.0000, 4.0000, 3.9571, 4.0857, 4.0714\}$$

$$r_{\text{vdw}}^{\text{Np}-\{\text{Cs}..\text{Rn}\}} = \{5.1857, 4.7143, 4.5143, 4.3000, 4.4572, 4.4429, 4.4286, 4.4143, 4.3571, 4.3714, 4.3571, 4.3429, 4.3286, 4.3286, 4.3143, 4.3857, 4.2857, 4.1572, 4.0714, 3.9571, 3.8857, 3.8571, 3.7857, 3.8000, 3.8143, 4.0857, 4.0571, 4.0571, 4.1429, 4.0714, 4.1715, 4.2285\}$$

$$r_{\text{vdw}}^{\text{Np}-\{\text{Fr}..\text{Rn}\}} = \{5.0714, 4.7857, 4.5857, 4.4572, 4.3714, 4.3857, 4.4000, 4.4143, 4.3286, 4.3286, 4.3571, 4.3571, 4.3143, 4.3429, 4.4286, 4.4572, 4.2714\}$$

## B.4.6 Plutonium

$$r_{\text{vdw}}^{\text{Pu}-\{\text{H}..\text{He}\}} = \{2.6714, 2.8714\}$$

$$r_{\text{vdw}}^{\text{Pu}-\{\text{Li}..\text{Ne}\}} = \{3.9286, 3.5571, 3.3143, 3.2857, 3.2286, 3.1143, 3.1285, 3.1714\}$$

$$r_{\text{vdw}}^{\text{Pu}-\{\text{Na}..\text{Ar}\}} = \{4.2143, 4.0000, 3.8286, 3.7000, 3.7857, 3.6714, 3.6286, 3.5857\}$$

$$r_{\text{vdw}}^{\text{Pu}-\{\text{K}..\text{Kr}\}} = \{4.7286, 4.4143, 4.1143, 3.9571, 3.9428, 3.7857, 3.7429, 3.7000, 3.6429, 3.6286, 3.6571, 3.7714, 3.8143, 3.7714, 3.8571, 3.7857, 3.8428, 3.8857\}$$

$$r_{\text{vdw}}^{\text{Pu}-\{\text{Rb}..\text{Xe}\}} = \{4.9143, 4.6000, 4.3143, 4.2000, 4.1000, 3.9857, 3.8571, 3.8286, 3.8286, 3.7572, 3.8571, 3.9714, 4.0429, 4.0143, 4.0143, 3.9714, 4.1000, 4.0857\}$$

$$r_{\text{vdw}}^{\text{Pu}-\{\text{Cs}..\text{Rn}\}} = \{5.2000, 4.7286, 4.5286, 4.3143, 4.4714, 4.4572, 4.4429, 4.4286, 4.3714, 4.3857, 4.3714, 4.3571, 4.3429, 4.3429, 4.3286, 4.4000, 4.3000, 4.1715, 4.0857, 3.9714, 3.9000, 3.8714, 3.8000, 3.8143, 3.8286, 4.1000, 4.0714, 4.0714, 4.1572, 4.0857, 4.1857, 4.2428\}$$

$$r_{\text{vdw}}^{\text{Pu}-\{\text{Fr}..\text{Rn}\}} = \{5.0857, 4.8000, 4.6000, 4.4714, 4.3857, 4.4000, 4.4143, 4.4286, 4.3429, 4.3429, 4.3714, 4.3714, 4.3286, 4.3571, 4.4429, 4.4714, 4.2857\}$$



## B.4.7 Americium

$$r_{\text{vdw}}^{\text{Am}\{-\{\text{H..He}\}\}} = \{2.5857, 2.7857\}$$

$$r_{\text{vdw}}^{\text{Am}\{-\{\text{Li..Ne}\}\}} = \{3.8428, 3.4714, 3.2286, 3.2000, 3.1428, 3.0286, 3.0429, 3.0857\}$$

$$r_{\text{vdw}}^{\text{Am}\{-\{\text{Na..Ar}\}\}} = \{4.1286, 3.9143, 3.7429, 3.6143, 3.7000, 3.5857, 3.5428, 3.5000\}$$

$$r_{\text{vdw}}^{\text{Am}\{-\{\text{K..Kr}\}\}} = \{4.6428, 4.3286, 4.0286, 3.8714, 3.8571, 3.7000, 3.6571, 3.6143, 3.5571, 3.5428, 3.5714, 3.6857, 3.7286, 3.6857, 3.7714, 3.7000, 3.7572, 3.8000\}$$

$$r_{\text{vdw}}^{\text{Am}\{-\{\text{Rb..Xe}\}\}} = \{4.8286, 4.5143, 4.2285, 4.1143, 4.0143, 3.9000, 3.7714, 3.7429, 3.7429, 3.6714, 3.7714, 3.8857, 3.9571, 3.9286, 3.9286, 3.8857, 4.0143, 4.0000\}$$

$$r_{\text{vdw}}^{\text{Am}\{-\{\text{Cs..Rn}\}\}} = \{5.1143, 4.6428, 4.4429, 4.2285, 4.3857, 4.3714, 4.3571, 4.3429, 4.2857, 4.3000, 4.2857, 4.2714, 4.2571, 4.2571, 4.2428, 4.3143, 4.2143, 4.0857, 4.0000, 3.8857, 3.8143, 3.7857, 3.7143, 3.7286, 3.7429, 4.0143, 3.9857, 3.9857, 4.0714, 4.0000, 4.1000, 4.1572\}$$

$$r_{\text{vdw}}^{\text{Am}\{-\{\text{Fr..Rn}\}\}} = \{5.0000, 4.7143, 4.5143, 4.3857, 4.3000, 4.3143, 4.3286, 4.3429, 4.2571, 4.2571, 4.2857, 4.2857, 4.2428, 4.2714, 4.3571, 4.3857, 4.2000\}$$

## B.4.8 Curium

$$r_{\text{vdw}}^{\text{Cm}\{-\{\text{H..He}\}\}} = \{2.5857, 2.7857\}$$

$$r_{\text{vdw}}^{\text{Cm}\{-\{\text{Li..Ne}\}\}} = \{3.8428, 3.4714, 3.2286, 3.2000, 3.1428, 3.0286, 3.0429, 3.0857\}$$

$$r_{\text{vdw}}^{\text{Cm}\{-\{\text{Na..Ar}\}\}} = \{4.1286, 3.9143, 3.7429, 3.6143, 3.7000, 3.5857, 3.5428, 3.5000\}$$

$$r_{\text{vdw}}^{\text{Cm}\{-\{\text{K..Kr}\}\}} = \{4.6428, 4.3286, 4.0286, 3.8714, 3.8571, 3.7000, 3.6571, 3.6143, 3.5571, 3.5428, 3.5714, 3.6857, 3.7286, 3.6857, 3.7714, 3.7000, 3.7572, 3.8000\}$$

$$r_{\text{vdw}}^{\text{Cm}\{-\{\text{Rb..Xe}\}\}} = \{4.8286, 4.5143, 4.2285, 4.1143, 4.0143, 3.9000, 3.7714, 3.7429, 3.7429, 3.6714, 3.7714, 3.8857, 3.9571, 3.9286, 3.9286, 3.8857, 4.0143, 4.0000\}$$

$$r_{\text{vdw}}^{\text{Cm}\{-\{\text{Cs..Rn}\}\}} = \{5.1143, 4.6428, 4.4429, 4.2285, 4.3857, 4.3714, 4.3571, 4.3429, 4.2857, 4.3000, 4.2857, 4.2714, 4.2571, 4.2571, 4.2428, 4.3143, 4.2143, 4.0857, 4.0000, 3.8857, 3.8143, 3.7857, 3.7143, 3.7286, 3.7429, 4.0143, 3.9857, 3.9857, 4.0714, 4.0000, 4.1000, 4.1572\}$$

$$r_{\text{vdw}}^{\text{Cm}\{-\{\text{Fr..Rn}\}\}} = \{5.0000, 4.7143, 4.5143, 4.3857, 4.3000, 4.3143, 4.3286, 4.3429, 4.2571, 4.2571, 4.2857, 4.2857, 4.2428, 4.2714, 4.3571, 4.3857, 4.2000\}$$

## B.4.9 Berkelium

$$r_{\text{vdw}}^{\text{Bk}-\{\text{H}..\text{He}\}} = \{2.6143, 2.8143\}$$

$$r_{\text{vdw}}^{\text{Bk}-\{\text{Li}..\text{Ne}\}} = \{3.8714, 3.5000, 3.2571, 3.2286, 3.1714, 3.0572, 3.0715, 3.1143\}$$

$$r_{\text{vdw}}^{\text{Bk}-\{\text{Na}..\text{Ar}\}} = \{4.1572, 3.9428, 3.7714, 3.6429, 3.7286, 3.6143, 3.5714, 3.5286\}$$

$$r_{\text{vdw}}^{\text{Bk}-\{\text{K}..\text{Kr}\}} = \{4.6714, 4.3571, 4.0571, 3.9000, 3.8857, 3.7286, 3.6857, 3.6429, 3.5857, 3.5714, 3.6000, 3.7143, 3.7572, 3.7143, 3.8000, 3.7286, 3.7857, 3.8286\}$$

$$r_{\text{vdw}}^{\text{Bk}-\{\text{Rb}..\text{Xe}\}} = \{4.8572, 4.5429, 4.2571, 4.1429, 4.0429, 3.9286, 3.8000, 3.7714, 3.7714, 3.7000, 3.8000, 3.9143, 3.9857, 3.9571, 3.9571, 3.9143, 4.0429, 4.0286\}$$

$$r_{\text{vdw}}^{\text{Bk}-\{\text{Cs}..\text{Rn}\}} = \{5.1429, 4.6714, 4.4714, 4.2571, 4.4143, 4.4000, 4.3857, 4.3714, 4.3143, 4.3286, 4.3143, 4.3000, 4.2857, 4.2857, 4.2714, 4.3429, 4.2428, 4.1143, 4.0286, 3.9143, 3.8428, 3.8143, 3.7429, 3.7572, 3.7714, 4.0429, 4.0143, 4.0143, 4.1000, 4.0286, 4.1286, 4.1857\}$$

$$r_{\text{vdw}}^{\text{Bk}-\{\text{Fr}..\text{Rn}\}} = \{5.0286, 4.7429, 4.5429, 4.4143, 4.3286, 4.3429, 4.3571, 4.3714, 4.2857, 4.2857, 4.3143, 4.3143, 4.2714, 4.3000, 4.3857, 4.4143, 4.2285\}$$

## B.4.10 Californium

$$r_{\text{vdw}}^{\text{Cf}-\{\text{H}..\text{He}\}} = \{2.6143, 2.8143\}$$

$$r_{\text{vdw}}^{\text{Cf}-\{\text{Li}..\text{Ne}\}} = \{3.8714, 3.5000, 3.2571, 3.2286, 3.1714, 3.0572, 3.0715, 3.1143\}$$

$$r_{\text{vdw}}^{\text{Cf}-\{\text{Na}..\text{Ar}\}} = \{4.1572, 3.9428, 3.7714, 3.6429, 3.7286, 3.6143, 3.5714, 3.5286\}$$

$$r_{\text{vdw}}^{\text{Cf}-\{\text{K}..\text{Kr}\}} = \{4.6714, 4.3571, 4.0571, 3.9000, 3.8857, 3.7286, 3.6857, 3.6429, 3.5857, 3.5714, 3.6000, 3.7143, 3.7572, 3.7143, 3.8000, 3.7286, 3.7857, 3.8286\}$$

$$r_{\text{vdw}}^{\text{Cf}-\{\text{Rb}..\text{Xe}\}} = \{4.8572, 4.5429, 4.2571, 4.1429, 4.0429, 3.9286, 3.8000, 3.7714, 3.7714, 3.7000, 3.8000, 3.9143, 3.9857, 3.9571, 3.9571, 3.9143, 4.0429, 4.0286\}$$

$$r_{\text{vdw}}^{\text{Cf}-\{\text{Cs}..\text{Rn}\}} = \{5.1429, 4.6714, 4.4714, 4.2571, 4.4143, 4.4000, 4.3857, 4.3714, 4.3143, 4.3286, 4.3143, 4.3000, 4.2857, 4.2857, 4.2714, 4.3429, 4.2428, 4.1143, 4.0286, 3.9143, 3.8428, 3.8143, 3.7429, 3.7572, 3.7714, 4.0429, 4.0143, 4.0143, 4.1000, 4.0286, 4.1286, 4.1857\}$$

$$r_{\text{vdw}}^{\text{Cf}-\{\text{Fr}..\text{Rn}\}} = \{5.0286, 4.7429, 4.5429, 4.4143, 4.3286, 4.3429, 4.3571, 4.3714, 4.2857, 4.2857, 4.3143, 4.3143, 4.2714, 4.3000, 4.3857, 4.4143, 4.2285\}$$

## B.4.11 Einsteinium

$$r_{\text{vdw}}^{\text{Es}-\{\text{H}..\text{He}\}} = \{2.5714, 2.7714\}$$

$$r_{\text{vdw}}^{\text{Es}-\{\text{Li}..\text{Ne}\}} = \{3.8286, 3.4572, 3.2143, 3.1857, 3.1285, 3.0143, 3.0286, 3.0715\}$$

$$r_{\text{vdw}}^{\text{Es}-\{\text{Na}..\text{Ar}\}} = \{4.1143, 3.9000, 3.7286, 3.6000, 3.6857, 3.5714, 3.5286, 3.4857\}$$

$$r_{\text{vdw}}^{\text{Es}-\{\text{K}..\text{Kr}\}} = \{4.6286, 4.3143, 4.0143, 3.8571, 3.8428, 3.6857, 3.6429, 3.6000, 3.5428, 3.5286, 3.5571, 3.6714, 3.7143, 3.6714, 3.7572, 3.6857, 3.7429, 3.7857\}$$

$$r_{\text{vdw}}^{\text{Es}-\{\text{Rb}..\text{Xe}\}} = \{4.8143, 4.5000, 4.2143, 4.1000, 4.0000, 3.8857, 3.7572, 3.7286, 3.7286, 3.6571, 3.7572, 3.8714, 3.9428, 3.9143, 3.9143, 3.8714, 4.0000, 3.9857\}$$

$$r_{\text{vdw}}^{\text{Es}-\{\text{Cs}..\text{Rn}\}} = \{5.1000, 4.6286, 4.4286, 4.2143, 4.3714, 4.3571, 4.3429, 4.3286, 4.2714, 4.2857, 4.2714, 4.2571, 4.2428, 4.2428, 4.2285, 4.3000, 4.2000, 4.0714, 3.9857, 3.8714, 3.8000, 3.7714, 3.7000, 3.7143, 3.7286, 4.0000, 3.9714, 3.9714, 4.0571, 3.9857, 4.0857, 4.1429\}$$

$$r_{\text{vdw}}^{\text{Es}-\{\text{Fr}..\text{Rn}\}} = \{4.9857, 4.7000, 4.5000, 4.3714, 4.2857, 4.3000, 4.3143, 4.3286, 4.2428, 4.2428, 4.2714, 4.2714, 4.2285, 4.2571, 4.3429, 4.3714, 4.1857\}$$

## B.4.12 Fermium

$$r_{\text{vdw}}^{\text{Fm}-\{\text{H}..\text{He}\}} = \{2.6000, 2.8000\}$$

$$r_{\text{vdw}}^{\text{Fm}-\{\text{Li}..\text{Ne}\}} = \{3.8571, 3.4857, 3.2429, 3.2143, 3.1571, 3.0429, 3.0572, 3.1000\}$$

$$r_{\text{vdw}}^{\text{Fm}-\{\text{Na}..\text{Ar}\}} = \{4.1429, 3.9286, 3.7572, 3.6286, 3.7143, 3.6000, 3.5571, 3.5143\}$$

$$r_{\text{vdw}}^{\text{Fm}-\{\text{K}..\text{Kr}\}} = \{4.6571, 4.3429, 4.0429, 3.8857, 3.8714, 3.7143, 3.6714, 3.6286, 3.5714, 3.5571, 3.5857, 3.7000, 3.7429, 3.7000, 3.7857, 3.7143, 3.7714, 3.8143\}$$

$$r_{\text{vdw}}^{\text{Fm}-\{\text{Rb}..\text{Xe}\}} = \{4.8429, 4.5286, 4.2428, 4.1286, 4.0286, 3.9143, 3.7857, 3.7572, 3.7572, 3.6857, 3.7857, 3.9000, 3.9714, 3.9428, 3.9428, 3.9000, 4.0286, 4.0143\}$$

$$r_{\text{vdw}}^{\text{Fm}-\{\text{Cs}..\text{Rn}\}} = \{5.1286, 4.6571, 4.4572, 4.2428, 4.4000, 4.3857, 4.3714, 4.3571, 4.3000, 4.3143, 4.3000, 4.2857, 4.2714, 4.2714, 4.2571, 4.3286, 4.2285, 4.1000, 4.0143, 3.9000, 3.8286, 3.8000, 3.7286, 3.7429, 3.7572, 4.0286, 4.0000, 4.0000, 4.0857, 4.0143, 4.1143, 4.1715\}$$

$$r_{\text{vdw}}^{\text{Fm}-\{\text{Fr}..\text{Rn}\}} = \{5.0143, 4.7286, 4.5286, 4.4000, 4.3143, 4.3286, 4.3429, 4.3571, 4.2714, 4.2714, 4.3000, 4.3000, 4.2571, 4.2857, 4.3714, 4.4000, 4.2143\}$$

### B.4.13 Mendeleevium

$$r_{\text{vdw}}^{\text{Md}-\{\text{H}..\text{He}\}} = \{2.6857, 2.8857\}$$

$$r_{\text{vdw}}^{\text{Md}-\{\text{Li}..\text{Ne}\}} = \{3.9428, 3.5714, 3.3286, 3.3000, 3.2429, 3.1285, 3.1428, 3.1857\}$$

$$r_{\text{vdw}}^{\text{Md}-\{\text{Na}..\text{Ar}\}} = \{4.2285, 4.0143, 3.8428, 3.7143, 3.8000, 3.6857, 3.6429, 3.6000\}$$

$$r_{\text{vdw}}^{\text{Md}-\{\text{K}..\text{Kr}\}} = \{4.7429, 4.4286, 4.1286, 3.9714, 3.9571, 3.8000, 3.7572, 3.7143, 3.6571, 3.6429, 3.6714, 3.7857, 3.8286, 3.7857, 3.8714, 3.8000, 3.8571, 3.9000\}$$

$$r_{\text{vdw}}^{\text{Md}-\{\text{Rb}..\text{Xe}\}} = \{4.9285, 4.6143, 4.3286, 4.2143, 4.1143, 4.0000, 3.8714, 3.8428, 3.8428, 3.7714, 3.8714, 3.9857, 4.0571, 4.0286, 4.0286, 3.9857, 4.1143, 4.1000\}$$

$$r_{\text{vdw}}^{\text{Md}-\{\text{Cs}..\text{Rn}\}} = \{5.2143, 4.7429, 4.5429, 4.3286, 4.4857, 4.4714, 4.4572, 4.4429, 4.3857, 4.4000, 4.3857, 4.3714, 4.3571, 4.3571, 4.3429, 4.4143, 4.3143, 4.1857, 4.1000, 3.9857, 3.9143, 3.8857, 3.8143, 3.8286, 3.8428, 4.1143, 4.0857, 4.0857, 4.1715, 4.1000, 4.2000, 4.2571\}$$

$$r_{\text{vdw}}^{\text{Md}-\{\text{Fr}..\text{Rn}\}} = \{5.1000, 4.8143, 4.6143, 4.4857, 4.4000, 4.4143, 4.4286, 4.4429, 4.3571, 4.3571, 4.3857, 4.3857, 4.3429, 4.3714, 4.4572, 4.4857, 4.3000\}$$

### B.4.14 Nobelium

$$r_{\text{vdw}}^{\text{No}-\{\text{H}..\text{He}\}} = \{2.7143, 2.9143\}$$

$$r_{\text{vdw}}^{\text{No}-\{\text{Li}..\text{Ne}\}} = \{3.9714, 3.6000, 3.3572, 3.3286, 3.2714, 3.1571, 3.1714, 3.2143\}$$

$$r_{\text{vdw}}^{\text{No}-\{\text{Na}..\text{Ar}\}} = \{4.2571, 4.0429, 3.8714, 3.7429, 3.8286, 3.7143, 3.6714, 3.6286\}$$

$$r_{\text{vdw}}^{\text{No}-\{\text{K}..\text{Kr}\}} = \{4.7714, 4.4572, 4.1572, 4.0000, 3.9857, 3.8286, 3.7857, 3.7429, 3.6857, 3.6714, 3.7000, 3.8143, 3.8571, 3.8143, 3.9000, 3.8286, 3.8857, 3.9286\}$$

$$r_{\text{vdw}}^{\text{No}-\{\text{Rb}..\text{Xe}\}} = \{4.9571, 4.6428, 4.3571, 4.2428, 4.1429, 4.0286, 3.9000, 3.8714, 3.8714, 3.8000, 3.9000, 4.0143, 4.0857, 4.0571, 4.0571, 4.0143, 4.1429, 4.1286\}$$

$$r_{\text{vdw}}^{\text{No}-\{\text{Cs}..\text{Rn}\}} = \{5.2429, 4.7714, 4.5714, 4.3571, 4.5143, 4.5000, 4.4857, 4.4714, 4.4143, 4.4286, 4.4143, 4.4000, 4.3857, 4.3857, 4.3714, 4.4429, 4.3429, 4.2143, 4.1286, 4.0143, 3.9428, 3.9143, 3.8428, 3.8571, 3.8714, 4.1429, 4.1143, 4.1143, 4.2000, 4.1286, 4.2285, 4.2857\}$$

$$r_{\text{vdw}}^{\text{No}-\{\text{Fr}..\text{Rn}\}} = \{5.1286, 4.8429, 4.6428, 4.5143, 4.4286, 4.4429, 4.4572, 4.4714, 4.3857, 4.3857, 4.4143, 4.4143, 4.3714, 4.4000, 4.4857, 4.5143, 4.3286\}$$

## B.4.15 Lawrencium

$$r_{\text{vdw}}^{\text{Lr}\{-\text{H}..\text{He}\}} = \{2.5286, 2.7286\}$$

$$r_{\text{vdw}}^{\text{Lr}\{-\text{Li}..\text{Ne}\}} = \{3.7857, 3.4143, 3.1714, 3.1428, 3.0857, 2.9714, 2.9857, 3.0286\}$$

$$r_{\text{vdw}}^{\text{Lr}\{-\text{Na}..\text{Ar}\}} = \{4.0714, 3.8571, 3.6857, 3.5571, 3.6429, 3.5286, 3.4857, 3.4429\}$$

$$r_{\text{vdw}}^{\text{Lr}\{-\text{K}..\text{Kr}\}} = \{4.5857, 4.2714, 3.9714, 3.8143, 3.8000, 3.6429, 3.6000, 3.5571, 3.5000, 3.4857, 3.5143, 3.6286, \\ 3.6714, 3.6286, 3.7143, 3.6429, 3.7000, 3.7429\}$$

$$r_{\text{vdw}}^{\text{Lr}\{-\text{Rb}..\text{Xe}\}} = \{4.7714, 4.4572, 4.1715, 4.0571, 3.9571, 3.8428, 3.7143, 3.6857, 3.6857, 3.6143, 3.7143, 3.8286, \\ 3.9000, 3.8714, 3.8714, 3.8286, 3.9571, 3.9428\}$$

$$r_{\text{vdw}}^{\text{Lr}\{-\text{Cs}..\text{Rn}\}} = \{5.0571, 4.5857, 4.3857, 4.1715, 4.3286, 4.3143, 4.3000, 4.2857, 4.2285, 4.2428, 4.2285, 4.2143, \\ 4.2000, 4.2000, 4.1857, 4.2571, 4.1572, 4.0286, 3.9428, 3.8286, 3.7572, 3.7286, 3.6571, 3.6714, \\ 3.6857, 3.9571, 3.9286, 3.9286, 4.0143, 3.9428, 4.0429, 4.1000\}$$

$$r_{\text{vdw}}^{\text{Lr}\{-\text{Fr}..\text{Rn}\}} = \{4.9428, 4.6571, 4.4572, 4.3286, 4.2428, 4.2571, 4.2714, 4.2857, 4.2000, 4.2000, 4.2285, 4.2285, \\ 4.1857, 4.2143, 4.3000, 4.3286, 4.1429\}$$

# C DFT-D4

## C.1 Chemical Hardnesses

Element-specific chemical hardnesses for the charge scaling function used to extrapolate the  $C_6$  coefficients in D4.

$$J_{\text{Ac..Lr}} = \{0.09920295, 0.10418621, 0.14235633, 0.16394294, 0.18551941, 0.22370139, \\ 0.25110000, 0.25030000, 0.28840000, 0.31000000, 0.33160000, 0.35320000, \\ 0.36820000, 0.39630000, 0.40140000\}$$

## C.2 Electronegativities

Pauling electronegativities are used for the covalent coordination number.

$$\text{EN}_{\text{Ac..Lr}} = \{1.10, 1.30, 1.50, 1.38, 1.36, 1.28, 1.30, 1.30, 1.30, 1.30, 1.30, 1.30, 1.30, 1.30, 1.30\}$$

## C.3 Reference Systems

**Table 1** List of used reference structures. '✓' indicates the use, '-' indicates no use.

| A  | AH <sub>0</sub> | AH <sub>1</sub> | AH <sub>2</sub> | AH <sub>3</sub> | AH <sub>4</sub> | AH <sub>5</sub> | AH <sub>6</sub> |
|----|-----------------|-----------------|-----------------|-----------------|-----------------|-----------------|-----------------|
| Fr | ✓               | ✓               | -               | -               | -               | -               | -               |
| Ra | ✓               | ✓               | ✓               | -               | -               | -               | -               |
| Ac | ✓               | ✓               | ✓               | ✓               | ✓               | ✓               | ✓               |
| Th | ✓               | ✓               | ✓               | ✓               | ✓               | -               | -               |
| Pa | ✓               | ✓               | ✓               | ✓               | ✓               | ✓               | ✓               |
| U  | ✓               | ✓               | -               | ✓               | ✓               | ✓               | ✓               |
| Np | ✓               | ✓               | ✓               | ✓               | ✓               | ✓               | ✓               |
| Pu | ✓               | ✓               | ✓               | ✓               | ✓               | ✓               | ✓               |
| Am | ✓               | ✓               | ✓               | ✓               | -               | ✓               | ✓               |
| Cm | ✓               | ✓               | ✓               | ✓               | ✓               | ✓               | ✓               |
| Bk | ✓               | ✓               | ✓               | ✓               | ✓               | -               | -               |
| Cf | ✓               | ✓               | ✓               | ✓               | ✓               | -               | ✓               |
| Es | ✓               | ✓               | ✓               | ✓               | ✓               | ✓               | ✓               |
| Fm | ✓               | ✓               | ✓               | ✓               | ✓               | ✓               | ✓               |
| Md | ✓               | ✓               | ✓               | ✓               | ✓               | -               | -               |
| No | ✓               | ✓               | ✓               | ✓               | ✓               | ✓               | ✓               |
| Lr | ✓               | ✓               | ✓               | ✓               | ✓               | ✓               | ✓               |

## C.4 Reference Data

The EEQ reference charge and coordination number are always given for the central actinide. The dynamic purely-imaginary frequency polarizabilities are given each for all following imaginary frequencies:

$$i\omega^I = \{0.000001, 0.05, 0.10, 0.20, 0.30, 0.40, \\ 0.50, 0.60, 0.70, 0.80, 0.90, 1.00, \\ 1.20, 1.40, 1.60, 1.80, 2.00, 2.50, \\ 3.00, 4.00, 5.00, 7.50, 10.00\}$$

### C.4.1 Actinium

#### C.4.1.1 Ac

$$\zeta_{\text{EEQ}}^{\text{Ac,ref}} = 0.0000 e^-$$

$$\text{CN}^{\text{Ac}} = 0.0000$$

$$\alpha^{\text{Ac}}(i\omega^I) = \{204.4018, 167.2136, 116.6977, 58.9802, 35.5482, 24.5444, \\ 18.4663, 14.6615, 12.0558, 10.1554, 8.7067, 7.5671, \\ 5.8965, 4.7423, 3.9076, 3.2826, 2.8016, 1.9881, \\ 1.4912, 0.9334, 0.6400, 0.3123, 0.1837\}$$

#### C.4.1.2 AcH

$$\zeta_{\text{EEQ}}^{\text{Ac,ref}} = 0.1175 e^-$$

$$\text{CN}^{\text{Ac}} = 0.8122$$

$$\alpha^{\text{Ac}}(i\omega^I) = \{183.4136, 151.7817, 106.8129, 57.3477, 36.6709, 26.2420, \\ 20.1263, 16.1394, 13.3399, 11.2679, 9.6751, 8.4158, \\ 6.5630, 5.2798, 4.3506, 3.6543, 3.1181, 2.2109, \\ 1.6568, 1.0354, 0.7092, 0.3456, 0.2031\}$$

#### C.4.1.3 AcH<sub>2</sub>

$$\zeta_{\text{EEQ}}^{\text{Ac,ref}} = 0.1897 e^-$$

$$\text{CN}^{\text{Ac}} = 1.6110$$

$$\alpha^{\text{Ac}}(i\omega^I) = \{161.4080, 115.7143, 81.7712, 50.0678, 34.9562, 26.1999, \\ 20.5872, 16.7261, 13.9261, 11.8135, 10.1705, 8.8623, \\ 6.9259, 5.5789, 4.6011, 3.8673, 3.3014, 2.3426, \\ 1.7561, 1.0977, 0.7520, 0.3664, 0.2154\}$$

#### C.4.1.4 AcH<sub>3</sub>

$$\zeta_{\text{EEQ}}^{\text{Ac,ref}} = 0.2380 e^{-}$$

$$\text{CN}^{\text{Ac}} = 2.4082$$

$$\alpha^{\text{Ac}}(i\omega^{\text{I}}) = \{67.3758, 65.1171, 59.4934, 45.8749, 34.8544, 27.0905, \\ 21.6504, 17.7357, 14.8287, 12.6069, 10.8667, 9.4755, \\ 7.4104, 5.9711, 4.9254, 4.1401, 3.5343, 2.5073, \\ 1.8789, 1.1737, 0.8036, 0.3913, 0.2299\}$$

#### C.4.1.5 AcH<sub>4</sub>

$$\zeta_{\text{EEQ}}^{\text{Ac,ref}} = 0.2714 e^{-}$$

$$\text{CN}^{\text{Ac}} = 3.1614$$

$$\alpha^{\text{Ac}}(i\omega^{\text{I}}) = \{164.9995, 91.9493, 68.8421, 49.6465, 37.6576, 29.3282, \\ 23.4479, 19.1936, 16.0279, 13.6085, 11.7157, 10.2048, \\ 7.9669, 6.4111, 5.2827, 4.4365, 3.7843, 2.6802, \\ 2.0057, 1.2503, 0.8548, 0.4155, 0.2438\}$$

#### C.4.1.6 AcH<sub>5</sub>

$$\zeta_{\text{EEQ}}^{\text{Ac,ref}} = 0.2925 e^{-}$$

$$\text{CN}^{\text{Ac}} = 3.8682$$

$$\alpha^{\text{Ac}}(i\omega^{\text{I}}) = \{171.2481, 134.6703, 94.9592, 58.8185, 42.2049, 32.1669, \\ 25.4549, 20.7157, 17.2343, 14.5948, 12.5410, 10.9080, \\ 8.4991, 6.8306, 5.6231, 4.7187, 4.0224, 2.8448, \\ 2.1262, 1.3227, 0.9030, 0.4379, 0.2567\}$$

#### C.4.1.7 AcH<sub>6</sub>

$$\zeta_{\text{EEQ}}^{\text{Ac,ref}} = 0.3094 e^{-}$$

$$\text{CN}^{\text{Ac}} = 4.6022$$

$$\alpha^{\text{Ac}}(i\omega^{\text{I}}) = \{213.4703, 168.2418, 114.2009, 65.8444, 46.0049, 34.7218, \\ 27.3472, 22.1893, 18.4197, 15.5715, 13.3612, 11.6077, \\ 9.0275, 7.2449, 5.9573, 4.9943, 4.2536, 3.0025, \\ 2.2404, 1.3901, 0.9471, 0.4579, 0.2680\}$$



## C.4.2 Thorium

### C.4.2.1 Th

$$\zeta_{\text{EEQ}}^{\text{Th,ref}} = 0.0000 e^-$$

$$\text{CN}^{\text{Th}} = 0.0000$$

$$\alpha^{\text{Th}}(i\omega^I) = \{151.3055, 132.0224, 100.3446, 57.1424, 36.8572, 26.3121, \\ 20.0922, 16.0586, 13.2527, 11.1957, 9.6267, 8.3935, \\ 6.5881, 5.3414, 4.4388, 3.7618, 3.2393, 2.3514, \\ 1.8034, 1.1756, 0.8333, 0.4292, 0.2597\}$$

### C.4.2.2 ThH

$$\zeta_{\text{EEQ}}^{\text{Th,ref}} = 0.0884 e^-$$

$$\text{CN}^{\text{Th}} = 0.8421$$

$$\alpha^{\text{Th}}(i\omega^I) = \{142.0153, 121.7331, 91.8673, 54.6347, 36.9218, 27.1646, \\ 21.1161, 17.0504, 14.1521, 11.9929, 10.3287, 9.0119, \\ 7.0733, 5.7297, 4.7553, 4.0241, 3.4599, 2.5018, \\ 1.9119, 1.2389, 0.8745, 0.4477, 0.2701\}$$

### C.4.2.3 ThH<sub>2</sub>

$$\zeta_{\text{EEQ}}^{\text{Th,ref}} = 0.1538 e^-$$

$$\text{CN}^{\text{Th}} = 1.6727$$

$$\alpha^{\text{Th}}(i\omega^I) = \{117.3110, 99.2298, 76.8788, 50.3595, 36.4314, 27.8345, \\ 22.0825, 18.0277, 15.0511, 12.7932, 11.0337, 9.6319, \\ 7.5577, 6.1155, 5.0688, 4.2834, 3.6777, 2.6504, \\ 2.0194, 1.3024, 0.9162, 0.4667, 0.2809\}$$

### C.4.2.4 ThH<sub>3</sub>

$$\zeta_{\text{EEQ}}^{\text{Th,ref}} = 0.2048 e^-$$

$$\text{CN}^{\text{Th}} = 2.5057$$

$$\alpha^{\text{Th}}(i\omega^I) = \{94.3173, 83.8298, 69.2481, 49.5422, 37.3912, 29.1787, \\ 23.4000, 19.2060, 16.0744, 13.6753, 11.7953, 10.2930, \\ 8.0657, 6.5164, 5.3926, 4.5501, 3.9010, 2.8019, \\ 2.1286, 1.3664, 0.9580, 0.4858, 0.2917\}$$

#### C.4.2.5 ThH<sub>4</sub>

$$\zeta_{\text{EEQ}}^{\text{Th,ref}} = 0.2433 e^{-}$$

$$\text{CN}^{\text{Th}} = 3.3346$$

$$\alpha^{\text{Th}}(i\omega^I) = \{63.9385, 62.4467, 58.5371, 47.9250, 38.0867, 30.4193, \\ 24.6745, 20.3674, 17.0925, 14.5574, 12.5588, 10.9565, \\ 8.5757, 6.9183, 5.7167, 4.8166, 4.1238, 2.9526, \\ 2.2370, 1.4299, 0.9995, 0.5046, 0.3024\}$$

### C.4.3 Protactinium

#### C.4.3.1 Pa

$$\zeta_{\text{EEQ}}^{\text{Pa,ref}} = 0.0000 e^{-}$$

$$\text{CN}^{\text{Pa}} = 0.0000$$

$$\alpha^{\text{Pa}}(i\omega^I) = \{166.6278, 141.2842, 102.4567, 54.4640, 34.1796, 24.3027, \\ 18.6668, 15.0571, 12.5482, 10.6994, 9.2777, 8.1496, \\ 6.4741, 5.2950, 4.4269, 3.7666, 3.2513, 2.3641, \\ 1.8105, 1.1737, 0.8277, 0.4230, 0.2550\}$$

#### C.4.3.2 PaH

$$\zeta_{\text{EEQ}}^{\text{Pa,ref}} = 0.1067 e^{-}$$

$$\text{CN}^{\text{Pa}} = 0.8509$$

$$\alpha^{\text{Pa}}(i\omega^I) = \{157.0761, 129.9417, 94.0821, 52.6867, 34.7765, 25.4912, \\ 19.9068, 16.1943, 13.5496, 11.5701, 10.0338, 8.8082, \\ 6.9822, 5.6965, 4.7513, 4.0337, 3.4750, 2.5159, \\ 1.9200, 1.2382, 0.8700, 0.4423, 0.2660\}$$

#### C.4.3.3 PaH<sub>2</sub>

$$\zeta_{\text{EEQ}}^{\text{Pa,ref}} = 0.1829 e^{-}$$

$$\text{CN}^{\text{Pa}} = 1.6824$$

$$\alpha^{\text{Pa}}(i\omega^I) = \{125.3575, 97.8437, 72.3248, 46.3110, 33.6241, 25.9618, \\ 20.8400, 17.1994, 14.4963, 12.4215, 10.7866, 9.4709, \\ 7.4983, 6.1056, 5.0823, 4.3065, 3.7035, 2.6714, \\ 2.0326, 1.3050, 0.9143, 0.4630, 0.2779\}$$

#### C.4.3.4 PaH<sub>3</sub>

$$\zeta_{\text{EEQ}}^{\text{Pa,ref}} = 0.2467 e^{-}$$

$$\text{CN}^{\text{Pa}} = 2.5614$$

$$\alpha^{\text{Pa}}(i\omega^{\text{I}}) = \{85.9686, 76.5628, 64.2652, 46.9224, 35.8901, 28.3127, \\ 22.9033, 18.9261, 15.9240, 13.6039, 11.7728, 10.3012, \\ 8.1048, 6.5655, 5.4425, 4.5965, 3.9422, 2.8299, \\ 2.1464, 1.3730, 0.9600, 0.4850, 0.2908\}$$

#### C.4.3.5 PaH<sub>4</sub>

$$\zeta_{\text{EEQ}}^{\text{Pa,ref}} = 0.2930 e^{-}$$

$$\text{CN}^{\text{Pa}} = 3.4147$$

$$\alpha^{\text{Pa}}(i\omega^{\text{I}}) = \{68.2275, 65.6186, 60.0315, 47.6360, 37.5304, 29.9831, \\ 24.3945, 20.2072, 17.0134, 14.5306, 12.5653, 10.9836, \\ 8.6224, 6.9698, 5.7664, 4.8615, 4.1631, 2.9787, \\ 2.2534, 1.4359, 1.0013, 0.5039, 0.3016\}$$

#### C.4.3.6 PaH<sub>5</sub>

$$\zeta_{\text{EEQ}}^{\text{Pa,ref}} = 0.3292 e^{-}$$

$$\text{CN}^{\text{Pa}} = 4.3316$$

$$\alpha^{\text{Pa}}(i\omega^{\text{I}}) = \{64.6792, 62.7769, 58.3982, 48.0808, 38.8770, 31.5484, \\ 25.8960, 21.5514, 18.1846, 15.5419, 13.4380, 11.7392, \\ 9.1986, 7.4202, 6.1268, 5.1560, 4.4081, 3.1435, \\ 2.3721, 1.5065, 1.0485, 0.5264, 0.3147\}$$

### C.4.4 Uranium

#### C.4.4.1 U

$$\zeta_{\text{EEQ}}^{\text{U,ref}} = 0.0000 e^{-}$$

$$\text{CN}^{\text{U}} = 0.0000$$

$$\alpha^{\text{U}}(i\omega^{\text{I}}) = \{159.6502, 135.8961, 98.5087, 52.3885, 32.9240, 23.4921, \\ 18.1200, 14.6740, 12.2717, 10.4953, 9.1247, 8.0337, \\ 6.4061, 5.2540, 4.4012, 3.7494, 3.2387, 2.3549, \\ 1.8012, 1.1640, 0.8188, 0.4171, 0.2512\}$$

#### C.4.4.2 UH

$$\zeta_{EEQ}^{U,ref} = 0.0796 e^{-}$$

$$CN^U = 0.8456$$

$$\alpha^U(i\omega^I) = \{152.0261, 128.0014, 92.7351, 51.5592, 33.7877, 24.6849, \\ 19.2730, 15.7027, 13.1694, 11.2757, 9.8051, 8.6299, \\ 6.8722, 5.6267, 4.7053, 4.0017, 3.4512, 2.5004, \\ 1.9065, 1.2259, 0.8593, 0.4354, 0.2615\}$$

#### C.4.4.3 UH<sub>3</sub>

$$\zeta_{EEQ}^{U,ref} = 0.1692 e^{-}$$

$$CN^U = 2.5008$$

$$\alpha^U(i\omega^I) = \{61.4628, 58.1569, 52.5979, 41.1736, 32.1633, 25.6872, \\ 21.0129, 17.5503, 14.9130, 12.8534, 11.2101, 9.8751, \\ 7.8534, 6.4113, 5.3438, 4.5301, 3.8949, 2.8030, \\ 2.1255, 1.3553, 0.9444, 0.4745, 0.2838\}$$

#### C.4.4.4 UH<sub>4</sub>

$$\zeta_{EEQ}^{U,ref} = 0.2039 e^{-}$$

$$CN^U = 3.3883$$

$$\alpha^U(i\omega^I) = \{57.7404, 56.8542, 53.0160, 43.4071, 34.8272, 28.1717, \\ 23.1479, 19.3339, 16.3931, 14.0848, 12.2416, 10.7465, \\ 8.4924, 6.8967, 5.7239, 4.8357, 4.1463, 2.9696, \\ 2.2450, 1.4269, 0.9927, 0.4980, 0.2977\}$$

#### C.4.4.5 UH<sub>5</sub>

$$\zeta_{EEQ}^{U,ref} = 0.1949 e^{-}$$

$$CN^U = 3.5705$$

$$\alpha^U(i\omega^I) = \{79.4644, 66.1196, 58.3425, 45.8165, 36.2236, 29.1720, \\ 23.9622, 20.0392, 17.0204, 14.6497, 12.7535, 11.2118, \\ 8.8797, 7.2209, 5.9979, 5.0687, 4.3459, 3.1092, \\ 2.3465, 1.4858, 1.0304, 0.5142, 0.3066\}$$

#### C.4.4.6 UH<sub>6</sub>

$$\zeta_{EEQ}^{U,\text{ref}} = 0.2456 e^{-}$$

$$CN^U = 5.1256$$

$$\alpha^U(i\omega^I) = \{70.4499, 68.4799, 63.4736, 50.8489, 40.1019, 32.1246, \\ 26.2551, 21.8601, 18.4967, 15.8684, 13.7751, 12.0799, \\ 9.5275, 7.7225, 6.3969, 5.3938, 4.6159, 3.2908, \\ 2.4779, 1.5649, 1.0839, 0.5404, 0.3221\}$$

### C.4.5 Neptunium

#### C.4.5.1 Np

$$\zeta_{EEQ}^{Np,\text{ref}} = 0.0000 e^{-}$$

$$CN^{Np} = 0.0000$$

$$\alpha^{Np}(i\omega^I) = \{152.1284, 112.6033, 75.4650, 40.7349, 27.3561, 20.6810, \\ 16.6271, 13.8530, 11.8127, 10.2409, 8.9907, 7.9726, \\ 6.4187, 5.2954, 4.4526, 3.8023, 3.2893, 2.3948, \\ 1.8309, 1.1805, 0.8288, 0.4212, 0.2535\}$$

#### C.4.5.2 NpH

$$\zeta_{EEQ}^{Np,\text{ref}} = 0.0766 e^{-}$$

$$CN^{Np} = 0.8493$$

$$\alpha^{Np}(i\omega^I) = \{134.2374, 104.3914, 73.7095, 42.8462, 29.7210, 22.6357, \\ 18.1747, 15.0874, 12.8156, 11.0712, 9.6899, 8.5700, \\ 6.8704, 5.6495, 4.7380, 4.0373, 3.4862, 2.5288, \\ 1.9277, 1.2375, 0.8661, 0.4381, 0.2630\}$$

#### C.4.5.3 NpH<sub>2</sub>

$$\zeta_{EEQ}^{Np,\text{ref}} = 0.1332 e^{-}$$

$$CN^{Np} = 1.6831$$

$$\alpha^{Np}(i\omega^I) = \{114.7257, 89.7632, 66.6972, 42.9194, 31.1632, 24.1344, \\ 19.4813, 16.1874, 13.7402, 11.8547, 10.3605, 9.1500, \\ 7.3160, 6.0025, 5.0243, 4.2741, 3.6852, 2.6647, \\ 2.0261, 1.2953, 0.9038, 0.4550, 0.2725\}$$

#### C.4.5.4 NpH<sub>3</sub>

$$\zeta_{\text{EEQ}}^{\text{Np,ref}} = 0.1755 e^-$$

$$\text{CN}^{\text{Np}} = 2.5168$$

$$\alpha^{\text{Np}}(i\omega^I) = \{60.0193, 57.7069, 52.4810, 40.8286, 31.7259, 25.2754, \\ 20.6624, 17.2654, 14.6872, 12.6774, 11.0747, 9.7721, \\ 7.7962, 6.3820, 5.3310, 4.5267, 3.8967, 2.8084, \\ 2.1298, 1.3566, 0.9441, 0.4735, 0.2831\}$$

#### C.4.5.5 NpH<sub>4</sub>

$$\zeta_{\text{EEQ}}^{\text{Np,ref}} = 0.2187 e^-$$

$$\text{CN}^{\text{Np}} = 3.3977$$

$$\alpha^{\text{Np}}(i\omega^I) = \{57.6363, 55.7487, 51.6348, 42.1037, 33.8112, 27.4067, \\ 22.5760, 18.9076, 16.0757, 13.8491, 12.0672, 10.6182, \\ 8.4250, 6.8637, 5.7105, 4.8331, 4.1493, 2.9761, \\ 2.2502, 1.4285, 0.9925, 0.4970, 0.2969\}$$

#### C.4.5.6 NpH<sub>5</sub>

$$\zeta_{\text{EEQ}}^{\text{Np,ref}} = 0.2424 e^-$$

$$\text{CN}^{\text{Np}} = 4.2360$$

$$\alpha^{\text{Np}}(i\omega^I) = \{79.8320, 75.1735, 66.0772, 49.2763, 37.7996, 29.9550, \\ 24.3771, 20.2708, 17.1576, 14.7371, 12.8142, 11.2583, \\ 8.9140, 7.2512, 6.0255, 5.0940, 4.3688, 3.1261, \\ 2.3586, 1.4919, 1.0338, 0.5156, 0.3074\}$$

#### C.4.5.7 NpH<sub>6</sub>

$$\zeta_{\text{EEQ}}^{\text{Np,ref}} = 0.2666 e^-$$

$$\text{CN}^{\text{Np}} = 5.0938$$

$$\alpha^{\text{Np}}(i\omega^I) = \{90.8036, 85.6050, 74.5057, 54.1948, 40.9874, 32.2515, \\ 26.1389, 21.6751, 18.3065, 15.6954, 13.6262, 11.9552, \\ 9.4435, 7.6670, 6.3604, 5.3694, 4.5990, 3.2820, \\ 2.4709, 1.5580, 1.0773, 0.5356, 0.3189\}$$

## C.4.6 Plutonium

### C.4.6.1 Pu

$$\zeta_{\text{EEQ}}^{\text{Pu,ref}} = 0.0000 e^-$$

$$\text{CN}^{\text{Pu}} = 0.0000$$

$$\alpha^{\text{Pu}}(i\omega^I) = \{172.7407, 145.6048, 101.7601, 50.1348, 29.9893, 20.8783, \\ 15.9825, 12.9731, 10.9295, 9.4374, 8.2894, 7.3721, \\ 5.9863, 4.9831, 4.2229, 3.6292, 3.1552, 2.3147, \\ 1.7750, 1.1444, 0.8014, 0.4049, 0.2429\}$$

### C.4.6.2 PuH

$$\zeta_{\text{EEQ}}^{\text{Pu,ref}} = 0.1495 e^-$$

$$\text{CN}^{\text{Pu}} = 0.8125$$

$$\alpha^{\text{Pu}}(i\omega^I) = \{140.6592, 109.3083, 72.9348, 39.9874, 27.0422, 20.3958, \\ 16.3706, 13.6553, 11.6836, 10.1759, 8.9797, 8.0043, \\ 6.5061, 5.4099, 4.5766, 3.9257, 3.4065, 2.4886, \\ 1.9019, 1.2200, 0.8514, 0.4280, 0.2562\}$$

### C.4.6.3 PuH<sub>2</sub>

$$\zeta_{\text{EEQ}}^{\text{Pu,ref}} = 0.2479 e^-$$

$$\text{CN}^{\text{Pu}} = 1.6569$$

$$\alpha^{\text{Pu}}(i\omega^I) = \{97.7402, 76.6674, 59.4822, 39.5057, 28.9200, 22.5125, \\ 18.2688, 15.2650, 13.0298, 11.3020, 9.9268, 8.8070, \\ 7.0972, 5.8593, 4.9281, 4.2076, 3.6375, 2.6400, \\ 2.0093, 1.2830, 0.8931, 0.4478, 0.2677\}$$

### C.4.6.4 PuH<sub>3</sub>

$$\zeta_{\text{EEQ}}^{\text{Pu,ref}} = 0.3181 e^-$$

$$\text{CN}^{\text{Pu}} = 2.4997$$

$$\alpha^{\text{Pu}}(i\omega^I) = \{55.3410, 53.3924, 49.1138, 38.9121, 30.5324, 24.4542, \\ 20.0614, 16.8099, 14.3348, 12.4010, 10.8559, 9.5976, \\ 7.6829, 6.3067, 5.2796, 4.4906, 3.8702, 2.7936, \\ 2.1188, 1.3476, 0.9362, 0.4682, 0.2796\}$$

#### C.4.6.5 PuH<sub>4</sub>

$$\zeta_{\text{EEQ}}^{\text{Pu,ref}} = 0.3779 e^{-}$$

$$\text{CN}^{\text{Pu}} = 3.3624$$

$$\alpha^{\text{Pu}}(i\omega^{\text{I}}) = \{64.4205, 57.8759, 51.6984, 41.3225, 33.0420, 26.7590, \\ 22.0509, 18.4870, 15.7401, 13.5812, 11.8529, 10.4461, \\ 8.3125, 6.7886, 5.6589, 4.7964, 4.1220, 2.9602, \\ 2.2381, 1.4185, 0.9838, 0.4912, 0.2932\}$$

#### C.4.6.6 PuH<sub>5</sub>

$$\zeta_{\text{EEQ}}^{\text{Pu,ref}} = 0.4092 e^{-}$$

$$\text{CN}^{\text{Pu}} = 4.1937$$

$$\alpha^{\text{Pu}}(i\omega^{\text{I}}) = \{84.8162, 79.2048, 68.1431, 49.2446, 37.2618, 29.3656, \\ 23.8516, 19.8305, 16.7968, 14.4437, 12.5760, 11.0646, \\ 8.7844, 7.1628, 5.9634, 5.0491, 4.3349, 3.1060, \\ 2.3435, 1.4802, 1.0238, 0.5091, 0.3032\}$$

#### C.4.6.7 PuH<sub>6</sub>

$$\zeta_{\text{EEQ}}^{\text{Pu,ref}} = 0.4364 e^{-}$$

$$\text{CN}^{\text{Pu}} = 5.0202$$

$$\alpha^{\text{Pu}}(i\omega^{\text{I}}) = \{104.8008, 96.5146, 80.5042, 55.4091, 40.9972, 31.9653, \\ 25.8009, 21.3575, 18.0288, 15.4598, 13.4288, 11.7907, \\ 9.3295, 7.5871, 6.3030, 5.3270, 4.5664, 3.2619, \\ 2.4554, 1.5458, 1.0668, 0.5288, 0.3144\}$$

### C.4.7 Americium

#### C.4.7.1 Am

$$\zeta_{\text{EEQ}}^{\text{Am,ref}} = 0.0000 e^{-}$$

$$\text{CN}^{\text{Am}} = 0.0000$$

$$\alpha^{\text{Am}}(i\omega^{\text{I}}) = \{165.6020, 140.4979, 99.0178, 49.3591, 29.6192, 20.6061, \\ 15.7483, 12.7644, 10.7433, 9.2722, 8.1437, 7.2442, \\ 5.8887, 4.9089, 4.1663, 3.5854, 3.1206, 2.2934, \\ 1.7596, 1.1336, 0.7927, 0.3995, 0.2395\}$$



#### C.4.7.2 AmH

$$\zeta_{EEQ}^{\text{Am,ref}} = 0.1510 e^{-}$$

$$\text{CN}^{\text{Am}} = 0.7827$$

$$\alpha^{\text{Am}}(i\omega^{\text{I}}) = \{133.0355, 104.9202, 71.4376, 39.7060, 26.7872, 20.1191, \\ 16.0991, 13.4054, 11.4613, 9.9818, 8.8117, 7.8596, \\ 6.3993, 5.3309, 4.5175, 3.8808, 3.3718, 2.4680, \\ 1.8874, 1.2101, 0.8434, 0.4231, 0.2530\}$$

#### C.4.7.3 AmH<sub>2</sub>

$$\zeta_{EEQ}^{\text{Am,ref}} = 0.2410 e^{-}$$

$$\text{CN}^{\text{Am}} = 1.5858$$

$$\alpha^{\text{Am}}(i\omega^{\text{I}}) = \{60.0172, 56.0455, 48.5551, 35.1427, 26.4217, 20.8390, \\ 17.0639, 14.3637, 12.3397, 10.7653, 9.5045, 8.4717, \\ 6.8811, 5.7168, 4.8322, 4.1417, 3.5913, 2.6183, \\ 1.9964, 1.2748, 0.8861, 0.4428, 0.2643\}$$

#### C.4.7.4 AmH<sub>3</sub>

$$\zeta_{EEQ}^{\text{Am,ref}} = 0.3068 e^{-}$$

$$\text{CN}^{\text{Am}} = 2.4639$$

$$\alpha^{\text{Am}}(i\omega^{\text{I}}) = \{54.6144, 51.1619, 47.1128, 37.5252, 29.5312, 23.6871, \\ 19.4572, 16.3295, 13.9514, 12.0946, 10.6105, 9.4006, \\ 7.5549, 6.2225, 5.2236, 4.4527, 3.8441, 2.7818, \\ 2.1119, 1.3428, 0.9318, 0.4650, 0.2775\}$$

#### C.4.7.5 AmH<sub>5</sub>

$$\zeta_{EEQ}^{\text{Am,ref}} = 0.3801 e^{-}$$

$$\text{CN}^{\text{Am}} = 4.1035$$

$$\alpha^{\text{Am}}(i\omega^{\text{I}}) = \{98.4838, 88.6035, 72.3489, 49.5094, 36.7446, 28.7273, \\ 23.2552, 19.3162, 16.3679, 14.0917, 12.2893, 10.8319, \\ 8.6315, 7.0620, 5.8964, 5.0040, 4.3040, 3.0923, \\ 2.3355, 1.4743, 1.0183, 0.5049, 0.3003\}$$

### C.4.7.6 AmH<sub>6</sub>

$$\zeta_{EEQ}^{\text{Am,ref}} = 0.4055 e^{-}$$

$$\text{CN}^{\text{Am}} = 4.9407$$

$$\alpha^{\text{Am}}(i\omega^{\text{I}}) = \{113.3351, 102.5161, 83.0136, 55.2298, 40.3635, 31.3182, \\ 25.2332, 20.8827, 17.6396, 15.1435, 13.1728, 11.5836, \\ 9.1935, 7.4970, 6.2427, 5.2859, 4.5380, 3.2490, \\ 2.4479, 1.5406, 1.0620, 0.5253, 0.3121\}$$

## C.4.8 Curium

### C.4.8.1 Cm

$$\zeta_{EEQ}^{\text{Cm,ref}} = 0.0000 e^{-}$$

$$\text{CN}^{\text{Cm}} = 0.0000$$

$$\alpha^{\text{Cm}}(i\omega^{\text{I}}) = \{134.3979, 116.1743, 86.3865, 47.1493, 29.7740, 21.2860, \\ 16.4818, 13.4222, 11.2973, 9.7266, 8.5121, 7.5415, \\ 6.0822, 5.0365, 4.2522, 3.6447, 3.1628, 2.3136, \\ 1.7710, 1.1385, 0.7954, 0.4006, 0.2401\}$$

### C.4.8.2 CmH

$$\zeta_{EEQ}^{\text{Cm,ref}} = 0.0764 e^{-}$$

$$\text{CN}^{\text{Cm}} = 0.8347$$

$$\alpha^{\text{Cm}}(i\omega^{\text{I}}) = \{126.6120, 109.3213, 81.5724, 47.0010, 31.2024, 22.8861, \\ 17.8997, 14.6120, 12.2878, 10.5566, 9.2154, 8.1445, \\ 6.5400, 5.3965, 4.5431, 3.8848, 3.3643, 2.4515, \\ 1.8710, 1.1977, 0.8343, 0.4183, 0.2502\}$$

### C.4.8.3 CmH<sub>2</sub>

$$\zeta_{EEQ}^{\text{Cm,ref}} = 0.1338 e^{-}$$

$$\text{CN}^{\text{Cm}} = 1.6490$$

$$\alpha^{\text{Cm}}(i\omega^{\text{I}}) = \{99.2440, 79.0152, 60.3295, 40.0819, 29.3586, 22.7763, \\ 18.3964, 15.3029, 13.0129, 11.2537, 9.8618, 8.7346, \\ 7.0244, 5.7943, 4.8728, 4.1614, 3.5990, 2.6141, \\ 1.9897, 1.2687, 0.8813, 0.4401, 0.2627\}$$

#### C.4.8.4 CmH<sub>3</sub>

$$\zeta_{EEQ}^{Cm,ref} = 0.1780 e^{-}$$

$$CN^{Cm} = 2.4732$$

$$\alpha^{Cm}(i\omega^I) = \{54.6754, 52.9826, 48.7627, 38.4660, 29.9916, 23.8922, \\ 19.5266, 16.3254, 13.9078, 12.0305, 10.5370, 9.3243, \\ 7.4828, 6.1595, 5.1700, 4.4077, 3.8062, 2.7562, \\ 2.0930, 1.3299, 0.9217, 0.4587, 0.2733\}$$

#### C.4.8.5 CmH<sub>4</sub>

$$\zeta_{EEQ}^{Cm,ref} = 0.2112 e^{-}$$

$$CN^{Cm} = 3.2623$$

$$\alpha^{Cm}(i\omega^I) = \{84.5347, 75.7999, 62.7375, 44.4811, 33.5258, 26.3562, \\ 21.3871, 17.7920, 15.0970, 13.0154, 11.3666, 10.0329, \\ 8.0176, 6.5777, 5.5061, 4.6836, 4.0368, 2.9122, \\ 2.2055, 1.3962, 0.9652, 0.4787, 0.2847\}$$

#### C.4.8.6 CmH<sub>5</sub>

$$\zeta_{EEQ}^{Cm,ref} = 0.2378 e^{-}$$

$$CN^{Cm} = 4.0576$$

$$\alpha^{Cm}(i\omega^I) = \{110.6679, 96.7153, 75.9750, 50.3031, 36.9564, 28.7507, \\ 23.1991, 19.2245, 16.2621, 13.9830, 12.1837, 10.7324, \\ 8.5474, 6.9930, 5.8404, 4.9585, 4.2667, 3.0681, \\ 2.3178, 1.4623, 1.0087, 0.4986, 0.2961\}$$

#### C.4.8.7 CmH<sub>6</sub>

$$\zeta_{EEQ}^{Cm,ref} = 0.2595 e^{-}$$

$$CN^{Cm} = 4.8597$$

$$\alpha^{Cm}(i\omega^I) = \{133.9582, 116.0315, 88.6352, 56.0351, 40.3478, 31.1150, \\ 24.9872, 20.6390, 17.4139, 14.9409, 12.9936, 11.4265, \\ 9.0741, 7.4064, 6.1735, 5.2324, 4.4958, 3.2235, \\ 2.4299, 1.5282, 1.0519, 0.5185, 0.3074\}$$

## C.4.9 Berkelium

### C.4.9.1 Bk

$$\zeta_{\text{EEQ}}^{\text{Bk,ref}} = 0.0000 e^-$$

$$\text{CN}^{\text{Bk}} = 0.0000$$

$$\alpha^{\text{Bk}}(i\omega^I) = \{150.0842, 129.4893, 93.3386, 47.5744, 28.7210, 19.9726, \\ 15.2302, 12.3184, 10.3534, 8.9302, 7.8439, 6.9817, \\ 5.6883, 4.7563, 4.0499, 3.4961, 3.0514, 2.2539, \\ 1.7337, 1.1173, 0.7796, 0.3907, 0.2336\}$$

### C.4.9.2 BkH

$$\zeta_{\text{EEQ}}^{\text{Bk,ref}} = 0.0221 e^-$$

$$\text{CN}^{\text{Bk}} = 0.8298$$

$$\alpha^{\text{Bk}}(i\omega^I) = \{125.9274, 104.0728, 75.8864, 43.2370, 28.7503, 21.1786, \\ 16.6538, 13.6738, 11.5652, 9.9909, 8.7667, 7.7850, \\ 6.3038, 5.2375, 4.4339, 3.8085, 3.3100, 2.4257, \\ 1.8563, 1.1893, 0.8273, 0.4132, 0.2466\}$$

### C.4.9.3 BkH<sub>2</sub>

$$\zeta_{\text{EEQ}}^{\text{Bk,ref}} = 0.0409 e^-$$

$$\text{CN}^{\text{Bk}} = 1.6684$$

$$\alpha^{\text{Bk}}(i\omega^I) = \{94.2401, 77.5244, 58.9430, 39.0623, 28.6154, 22.2014, \\ 17.9362, 14.9285, 12.7061, 11.0009, 9.6529, 8.5611, \\ 6.9035, 5.7088, 4.8113, 4.1163, 3.5652, 2.5959, \\ 1.9780, 1.2611, 0.8750, 0.4358, 0.2598\}$$

### C.4.9.4 BkH<sub>3</sub>

$$\zeta_{\text{EEQ}}^{\text{Bk,ref}} = 0.0562 e^-$$

$$\text{CN}^{\text{Bk}} = 2.5022$$

$$\alpha^{\text{Bk}}(i\omega^I) = \{52.9670, 51.2081, 47.2097, 37.3875, 29.2191, 23.3037, \\ 19.0603, 15.9482, 13.5995, 11.7770, 10.3277, 9.1508, \\ 7.3623, 6.0746, 5.1094, 4.3635, 3.7735, 2.7388, \\ 2.0819, 1.3228, 0.9157, 0.4546, 0.2705\}$$

#### C.4.9.5 BkH<sub>4</sub>

$$\zeta_{\text{EEQ}}^{\text{Bk,ref}} = 0.0711 e^{-}$$

$$\text{CN}^{\text{Bk}} = 3.3645$$

$$\alpha^{\text{Bk}}(i\omega^I) = \{64.0310, 57.6316, 50.4511, 39.9025, 31.7426, 25.6004, \\ 21.0403, 17.6214, 15.0076, 12.9657, 11.3372, 10.0143, \\ 8.0081, 6.5712, 5.5009, 4.6791, 4.0329, 2.9094, \\ 2.2032, 1.3943, 0.9636, 0.4776, 0.2840\}$$

#### C.4.10 Californium

##### C.4.10.1 Cf

$$\zeta_{\text{EEQ}}^{\text{Cf,ref}} = 0.0000 e^{-}$$

$$\text{CN}^{\text{Cf}} = 0.0000$$

$$\alpha^{\text{Cf}}(i\omega^I) = \{148.0092, 127.6683, 91.8844, 46.6739, 28.1153, 19.5156, \\ 14.8547, 11.9926, 10.0613, 8.6633, 7.5975, 6.7529, \\ 5.4898, 4.5835, 3.8992, 3.3644, 2.9358, 2.1685, \\ 1.6685, 1.0759, 0.7512, 0.3775, 0.2265\}$$

##### C.4.10.2 CfH

$$\zeta_{\text{EEQ}}^{\text{Cf,ref}} = 0.1535 e^{-}$$

$$\text{CN}^{\text{Cf}} = 0.8190$$

$$\alpha^{\text{Cf}}(i\omega^I) = \{130.7987, 103.8692, 70.9979, 39.3131, 26.2475, 19.4914, \\ 15.4458, 12.7645, 10.8527, 9.4146, 8.2889, 7.3811, \\ 6.0027, 5.0037, 4.2470, 3.6557, 3.1827, 2.3393, \\ 1.7930, 1.1501, 0.8003, 0.4003, 0.2395\}$$

##### C.4.10.3 CfH<sub>2</sub>

$$\zeta_{\text{EEQ}}^{\text{Cf,ref}} = 0.2539 e^{-}$$

$$\text{CN}^{\text{Cf}} = 1.6345$$

$$\alpha^{\text{Cf}}(i\omega^I) = \{53.3942, 50.4801, 44.7056, 33.0885, 24.9852, 19.6813, \\ 16.0762, 13.5014, 11.5795, 10.0918, 8.9061, 7.9390, \\ 6.4567, 5.3760, 4.5561, 3.9154, 3.4034, 2.4929, \\ 1.9055, 1.2173, 0.8448, 0.4208, 0.2512\}$$

#### C.4.10.4 CfH<sub>3</sub>

$$\zeta_{\text{EEQ}}^{\text{Cf,ref}} = 0.3321 e^{-}$$

$$\text{CN}^{\text{Cf}} = 2.5078$$

$$\alpha^{\text{Cf}}(i\omega^{\text{I}}) = \{50.4030, 48.8895, 45.1750, 36.0185, 28.2961, 22.6345, \\ 18.5399, 15.5218, 13.2371, 11.4613, 10.0478, 8.8997, \\ 7.1552, 5.9002, 4.9604, 4.2349, 3.6615, 2.6568, \\ 2.0193, 1.2829, 0.8883, 0.4418, 0.2636\}$$

#### C.4.10.5 CfH<sub>4</sub>

$$\zeta_{\text{EEQ}}^{\text{Cf,ref}} = 0.3868 e^{-}$$

$$\text{CN}^{\text{Cf}} = 3.3439$$

$$\alpha^{\text{Cf}}(i\omega^{\text{I}}) = \{81.5875, 68.6608, 56.5880, 41.3108, 31.7640, 25.2149, \\ 20.5502, 17.1270, 14.5428, 12.5405, 10.9528, 9.6682, \\ 7.7278, 6.3424, 5.3117, 4.5206, 3.8982, 2.8146, \\ 2.1321, 1.3490, 0.9318, 0.4619, 0.2752\}$$

#### C.4.10.6 CfH<sub>6</sub>

$$\zeta_{\text{EEQ}}^{\text{Cf,ref}} = 0.4500 e^{-}$$

$$\text{CN}^{\text{Cf}} = 4.9836$$

$$\alpha^{\text{Cf}}(i\omega^{\text{I}}) = \{129.7015, 111.1969, 84.3720, 53.9448, 39.1948, 30.3205, \\ 24.3568, 20.1026, 16.9428, 14.5209, 12.6163, 11.0861, \\ 8.7940, 7.1734, 5.9775, 5.0658, 4.3527, 3.1210, \\ 2.3523, 1.4783, 1.0166, 0.5008, 0.2974\}$$

### C.4.11 Einsteinium

#### C.4.11.1 Es

$$\zeta_{\text{EEQ}}^{\text{Es,ref}} = 0.0000 e^{-}$$

$$\text{CN}^{\text{Es}} = 0.0000$$

$$\alpha^{\text{Es}}(i\omega^{\text{I}}) = \{141.2202, 122.5207, 89.0107, 45.7447, 27.7132, 19.2897, \\ 14.6963, 11.8616, 9.9415, 8.5483, 7.4848, 6.6421, \\ 5.3832, 4.4828, 3.8054, 3.2777, 2.8561, 2.1041, \\ 1.6159, 1.0394, 0.7247, 0.3640, 0.2187\}$$

#### C.4.11.2 EsH

$$\zeta_{\text{EEQ}}^{\text{Es,ref}} = 0.1135 e^{-}$$

$$\text{CN}^{\text{Es}} = 0.7985$$

$$\alpha^{\text{Es}}(i\omega^{\text{I}}) = \{127.1191, 101.1672, 69.0945, 38.4335, 25.7934, 19.2100, \\ 15.2410, 12.5963, 10.7034, 9.2761, 8.1578, 7.2557, \\ 5.8873, 4.8979, 4.1504, 3.5677, 3.1025, 2.2754, \\ 1.7412, 1.1143, 0.7743, 0.3869, 0.2318\}$$

#### C.4.11.3 EsH<sub>2</sub>

$$\zeta_{\text{EEQ}}^{\text{Es,ref}} = 0.1914 e^{-}$$

$$\text{CN}^{\text{Es}} = 1.6077$$

$$\alpha^{\text{Es}}(i\omega^{\text{I}}) = \{51.5499, 49.1952, 43.8725, 32.7274, 24.7931, 19.5486, \\ 15.9633, 13.3936, 11.4717, 9.9828, 8.7965, 7.8296, \\ 6.3506, 5.2757, 4.4628, 3.8295, 3.3245, 2.4294, \\ 1.8537, 1.1814, 0.8187, 0.4075, 0.2435\}$$

#### C.4.11.4 EsH<sub>3</sub>

$$\zeta_{\text{EEQ}}^{\text{Es,ref}} = 0.2550 e^{-}$$

$$\text{CN}^{\text{Es}} = 2.4859$$

$$\alpha^{\text{Es}}(i\omega^{\text{I}}) = \{48.7142, 47.1908, 43.6761, 35.1176, 27.7849, 22.3133, \\ 18.3100, 15.3383, 13.0793, 11.3191, 9.9161, 8.7758, \\ 7.0434, 5.7984, 4.8676, 4.1505, 3.5844, 2.5952, \\ 1.9692, 1.2483, 0.8632, 0.4290, 0.2563\}$$

#### C.4.11.5 EsH<sub>4</sub>

$$\zeta_{\text{EEQ}}^{\text{Es,ref}} = 0.2969 e^{-}$$

$$\text{CN}^{\text{Es}} = 3.3091$$

$$\alpha^{\text{Es}}(i\omega^{\text{I}}) = \{85.3607, 70.4284, 56.8604, 40.9584, 31.3950, 24.9037, \\ 20.2901, 16.9043, 14.3470, 12.3647, 10.7924, 9.5203, \\ 7.5995, 6.2294, 5.2114, 4.4310, 3.8176, 2.7517, \\ 2.0815, 1.3142, 0.9065, 0.4489, 0.2677\}$$

#### C.4.11.6 EsH<sub>5</sub>

$$\zeta_{\text{EEQ}}^{\text{Es,ref}} = 0.3268 e^{-}$$

$$\text{CN}^{\text{Es}} = 4.1146$$

$$\alpha^{\text{Es}}(i\omega^{\text{I}}) = \{117.4576, 94.0369, 70.6831, 47.1236, 35.1066, 27.5008, \\ 22.2442, 18.4361, 15.5817, 13.3811, 11.6436, 10.2434, \\ 8.1401, 6.6487, 5.5461, 4.7042, 4.0450, 2.9043, \\ 2.1910, 1.3783, 0.9486, 0.4682, 0.2787\}$$

#### C.4.11.7 EsH<sub>6</sub>

$$\zeta_{\text{EEQ}}^{\text{Es,ref}} = 0.3471 e^{-}$$

$$\text{CN}^{\text{Es}} = 4.8927$$

$$\alpha^{\text{Es}}(i\omega^{\text{I}}) = \{150.7635, 117.5979, 85.0999, 53.7332, 38.9845, 30.1309, \\ 24.1805, 19.9357, 16.7838, 14.3694, 12.4720, 10.9488, \\ 8.6702, 7.0621, 5.8775, 4.9758, 4.2715, 3.0573, \\ 2.3010, 1.4429, 0.9909, 0.4876, 0.2897\}$$

### C.4.12 Fermium

#### C.4.12.1 Fm

$$\zeta_{\text{EEQ}}^{\text{Fm,ref}} = 0.0000 e^{-}$$

$$\text{CN}^{\text{Fm}} = 0.0000$$

$$\alpha^{\text{Fm}}(i\omega^{\text{I}}) = \{134.5132, 117.3651, 86.0922, 44.8044, 27.3253, 19.0895, \\ 14.5665, 11.7578, 9.8460, 8.4541, 7.3900, 6.5464, \\ 5.2878, 4.3906, 3.7182, 3.1965, 2.7809, 2.0431, \\ 1.5662, 1.0052, 0.7001, 0.3517, 0.2116\}$$

#### C.4.12.2 FmH

$$\zeta_{\text{EEQ}}^{\text{Fm,ref}} = 0.0986 e^{-}$$

$$\text{CN}^{\text{Fm}} = 0.8119$$

$$\alpha^{\text{Fm}}(i\omega^{\text{I}}) = \{123.4198, 98.0796, 67.3261, 37.7049, 25.4442, 19.0089, \\ 15.0993, 12.4780, 10.5937, 9.1694, 8.0521, 7.1509, \\ 5.7858, 4.8017, 4.0608, 3.4851, 3.0267, 2.2145, \\ 1.6918, 1.0804, 0.7499, 0.3747, 0.2248\}$$



### C.4.12.3 FmH<sub>2</sub>

$$\zeta_{\text{EEQ}}^{\text{Fm,ref}} = 0.1669 e^{-}$$

$$\text{CN}^{\text{Fm}} = 1.6382$$

$$\alpha^{\text{Fm}}(i\omega^{\text{I}}) = \{49.2490, 47.1165, 42.3468, 32.0195, 24.4466, 19.3483, \\ 15.8217, 13.2749, 11.3611, 9.8750, 8.6897, 7.7238, \\ 6.2483, 5.1792, 4.3731, 3.7470, 3.2490, 2.3689, \\ 1.8049, 1.1480, 0.7947, 0.3954, 0.2366\}$$

### C.4.12.4 FmH<sub>3</sub>

$$\zeta_{\text{EEQ}}^{\text{Fm,ref}} = 0.2230 e^{-}$$

$$\text{CN}^{\text{Fm}} = 2.5122$$

$$\alpha^{\text{Fm}}(i\omega^{\text{I}}) = \{48.8290, 46.7101, 42.7342, 34.2569, 27.1850, 21.8935, \\ 17.9996, 15.0946, 12.8774, 11.1448, 9.7612, 8.6353, \\ 6.9236, 5.6936, 4.7749, 4.0677, 3.5103, 2.5374, \\ 1.9230, 1.2169, 0.8407, 0.4177, 0.2498\}$$

### C.4.12.5 FmH<sub>4</sub>

$$\zeta_{\text{EEQ}}^{\text{Fm,ref}} = 0.2583 e^{-}$$

$$\text{CN}^{\text{Fm}} = 3.3309$$

$$\alpha^{\text{Fm}}(i\omega^{\text{I}}) = \{89.9278, 70.7327, 55.9993, 40.2168, 30.9059, 24.5634, \\ 20.0342, 16.6976, 14.1706, 12.2082, 10.6501, 9.3888, \\ 7.4844, 6.1272, 5.1200, 4.3490, 3.7438, 2.6938, \\ 2.0351, 1.2826, 0.8838, 0.4375, 0.2611\}$$

### C.4.12.6 FmH<sub>5</sub>

$$\zeta_{\text{EEQ}}^{\text{Fm,ref}} = 0.2846 e^{-}$$

$$\text{CN}^{\text{Fm}} = 4.1502$$

$$\alpha^{\text{Fm}}(i\omega^{\text{I}}) = \{116.8174, 93.2645, 70.0509, 46.6547, 34.7568, 27.2346, \\ 22.0313, 18.2566, 15.4237, 13.2378, 11.5112, 10.1197, \\ 8.0302, 6.5502, 5.4575, 4.6245, 3.9729, 2.8478, \\ 2.1456, 1.3474, 0.9263, 0.4571, 0.2723\}$$

#### C.4.12.7 FmH<sub>6</sub>

$$\zeta_{\text{EEQ}}^{\text{Fm,ref}} = 0.3046 e^{-}$$

$$\text{CN}^{\text{Fm}} = 4.9727$$

$$\alpha^{\text{Fm}}(i\omega^{\text{I}}) = \{135.6122, 112.6928, 83.8706, 53.3717, 38.7176, 29.9159, \\ 24.0013, 19.7799, 16.6433, 14.2394, 12.3499, 10.8330, \\ 8.5652, 6.9665, 5.7906, 4.8969, 4.1998, 3.0005, \\ 2.2553, 1.4119, 0.9688, 0.4767, 0.2835\}$$

#### C.4.13 Mendeleevium

##### C.4.13.1 Md

$$\zeta_{\text{EEQ}}^{\text{Md,ref}} = 0.0000 e^{-}$$

$$\text{CN}^{\text{Md}} = 0.0000$$

$$\alpha^{\text{Md}}(i\omega^{\text{I}}) = \{130.2072, 114.1115, 84.3233, 44.1736, 26.9220, 18.7618, \\ 14.2891, 11.5253, 9.6545, 8.2988, 7.2654, 6.4473, \\ 5.2262, 4.3528, 3.6953, 3.1826, 2.7725, 2.0398, \\ 1.5632, 1.0002, 0.6938, 0.3454, 0.2067\}$$

##### C.4.13.2 MdH

$$\zeta_{\text{EEQ}}^{\text{Md,ref}} = 0.0678 e^{-}$$

$$\text{CN}^{\text{Md}} = 0.8302$$

$$\alpha^{\text{Md}}(i\omega^{\text{I}}) = \{122.3584, 96.7486, 66.8293, 37.3575, 25.1065, 18.6943, \\ 14.8200, 12.2393, 10.3950, 9.0070, 7.9210, 7.0460, \\ 5.7195, 4.7603, 4.0351, 3.4690, 3.0165, 2.2102, \\ 1.6882, 1.0751, 0.7434, 0.3684, 0.2199\}$$

##### C.4.13.3 MdH<sub>2</sub>

$$\zeta_{\text{EEQ}}^{\text{Md,ref}} = 0.1158 e^{-}$$

$$\text{CN}^{\text{Md}} = 1.6730$$

$$\alpha^{\text{Md}}(i\omega^{\text{I}}) = \{50.5776, 48.2323, 43.1075, 32.1978, 24.3574, 19.1618, \\ 15.6147, 13.0800, 11.1906, 9.7313, 8.5713, 7.6275, \\ 6.1860, 5.1392, 4.3475, 3.7302, 3.2377, 2.3633, \\ 1.8001, 1.1419, 0.7877, 0.3889, 0.2316\}$$

#### C.4.13.4 MdH<sub>3</sub>

$$\zeta_{\text{EEQ}}^{\text{Md,ref}} = 0.1537 e^{-}$$

$$\text{CN}^{\text{Md}} = 2.5241$$

$$\alpha^{\text{Md}}(i\omega^{\text{I}}) = \{71.2250, 59.4086, 48.9788, 35.5944, 27.1964, 21.5384, \\ 17.5690, 14.6827, 12.5134, 10.8341, 9.5007, 8.4192, \\ 6.7772, 5.5953, 4.7088, 4.0230, 3.4795, 2.5235, \\ 1.9142, 1.2089, 0.8320, 0.4098, 0.2437\}$$

#### C.4.13.5 MdH<sub>4</sub>

$$\zeta_{\text{EEQ}}^{\text{Md,ref}} = 0.1790 e^{-}$$

$$\text{CN}^{\text{Md}} = 3.3654$$

$$\alpha^{\text{Md}}(i\omega^{\text{I}}) = \{100.3385, 84.3364, 64.3830, 42.1401, 30.8494, 23.9709, \\ 19.3556, 16.0718, 13.6333, 11.7604, 10.2817, 9.0876, \\ 7.2842, 5.9936, 5.0301, 4.2876, 3.7012, 2.6742, \\ 2.0231, 1.2732, 0.8742, 0.4292, 0.2548\}$$

### C.4.14 Nobelium

#### C.4.14.1 No

$$\zeta_{\text{EEQ}}^{\text{No,ref}} = 0.0000 e^{-}$$

$$\text{CN}^{\text{No}} = 0.0000$$

$$\alpha^{\text{No}}(i\omega^{\text{I}}) = \{124.8053, 110.0045, 82.1184, 43.5324, 26.6191, 18.5568, \\ 14.1262, 11.3883, 9.5372, 8.1977, 7.1779, 6.3711, \\ 5.1672, 4.3056, 3.6562, 3.1492, 2.7430, 2.0162, \\ 1.5427, 0.9830, 0.6791, 0.3356, 0.2000\}$$

#### C.4.14.2 NoH

$$\zeta_{\text{EEQ}}^{\text{No,ref}} = 0.0480 e^{-}$$

$$\text{CN}^{\text{No}} = 0.8313$$

$$\alpha^{\text{No}}(i\omega^{\text{I}}) = \{116.7644, 95.7311, 67.1224, 37.6423, 25.1783, 18.6618, \\ 14.7430, 12.1468, 10.3011, 8.9178, 7.8389, 6.9716, \\ 5.6589, 4.7104, 3.9930, 3.4327, 2.9844, 2.1846, \\ 1.6662, 1.0571, 0.7282, 0.3583, 0.2130\}$$

#### C.4.14.3 NoH<sub>2</sub>

$$\zeta_{\text{EEQ}}^{\text{No,ref}} = 0.0865 e^{-}$$

$$\text{CN}^{\text{No}} = 1.6766$$

$$\alpha^{\text{No}}(i\omega^I) = \{50.1539, 47.9468, 42.8473, 32.0060, 24.1920, 19.0044, \\ 15.4660, 12.9435, 11.0681, 9.6229, 8.4760, 7.5438, \\ 6.1208, 5.0872, 4.3047, 3.6940, 3.2061, 2.3386, \\ 1.7789, 1.1246, 0.7730, 0.3791, 0.2249\}$$

#### C.4.14.4 NoH<sub>3</sub>

$$\zeta_{\text{EEQ}}^{\text{No,ref}} = 0.1174 e^{-}$$

$$\text{CN}^{\text{No}} = 2.5187$$

$$\alpha^{\text{No}}(i\omega^I) = \{91.3664, 69.0315, 53.6426, 36.5348, 27.1761, 21.2644, \\ 17.2505, 14.3838, 12.2513, 10.6103, 9.3115, 8.2595, \\ 6.6624, 5.5111, 4.6451, 3.9732, 3.4392, 2.4962, \\ 1.8924, 1.1916, 0.8171, 0.3995, 0.2367\}$$

#### C.4.14.5 NoH<sub>4</sub>

$$\zeta_{\text{EEQ}}^{\text{No,ref}} = 0.1411 e^{-}$$

$$\text{CN}^{\text{No}} = 3.3606$$

$$\alpha^{\text{No}}(i\omega^I) = \{124.2502, 93.6045, 66.8688, 42.1118, 30.4955, 23.5931, \\ 19.0154, 15.7804, 13.3884, 11.5558, 10.1109, 8.9447, \\ 7.1826, 5.9194, 4.9742, 4.2439, 3.6657, 2.6499, \\ 2.0034, 1.2571, 0.8603, 0.4195, 0.2481\}$$

#### C.4.14.6 NoH<sub>5</sub>

$$\zeta_{\text{EEQ}}^{\text{No,ref}} = 0.1577 e^{-}$$

$$\text{CN}^{\text{No}} = 3.6258$$

$$\alpha^{\text{No}}(i\omega^I) = \{129.4476, 97.8022, 70.5399, 44.9645, 32.7583, 25.4115, \\ 20.4945, 17.0008, 14.4106, 12.4243, 10.8583, 9.5952, \\ 7.6891, 6.3255, 5.3072, 4.5217, 3.9009, 2.8126, \\ 2.1222, 1.3278, 0.9069, 0.4408, 0.2602\}$$

#### C.4.14.7 NoH<sub>6</sub>

$$\zeta_{\text{EEQ}}^{\text{No,ref}} = 0.1718 e^{-}$$

$$\text{CN}^{\text{No}} = 3.8556$$

$$\alpha^{\text{No}}(i\omega^{\text{I}}) = \{134.8207, 102.1887, 74.4006, 47.9165, 35.0576, 27.2358, \\ 21.9653, 18.2071, 15.4170, 13.2771, 11.5910, 10.2322, \\ 8.1849, 6.7231, 5.6333, 4.7940, 4.1314, 2.9723, \\ 2.2389, 1.3973, 0.9527, 0.4619, 0.2722\}$$

#### C.4.15 Lawrencium

##### C.4.15.1 Lr

$$\zeta_{\text{EEQ}}^{\text{Lr,ref}} = 0.0000 e^{-}$$

$$\text{CN}^{\text{Lr}} = 0.0000$$

$$\alpha^{\text{Lr}}(i\omega^{\text{I}}) = \{206.6533, 83.6937, 64.8432, 38.7234, 25.1567, 18.0960, \\ 14.0318, 11.4483, 9.6674, 8.3601, 7.3535, 6.5499, \\ 5.3380, 4.4612, 3.7954, 3.2730, 2.8533, 2.1000, \\ 1.6079, 1.0247, 0.7070, 0.3475, 0.2059\}$$

##### C.4.15.2 LrH

$$\zeta_{\text{EEQ}}^{\text{Lr,ref}} = 0.0505 e^{-}$$

$$\text{CN}^{\text{Lr}} = 0.8179$$

$$\alpha^{\text{Lr}}(i\omega^{\text{I}}) = \{92.3161, 82.9674, 65.8156, 40.9485, 27.9903, 20.6982, \\ 16.1942, 13.1960, 11.0780, 9.5086, 8.3004, 7.3410, \\ 5.9115, 4.8952, 4.1354, 3.5468, 3.0786, 2.2487, \\ 1.7134, 1.0857, 0.7467, 0.3654, 0.2160\}$$

##### C.4.15.3 LrH<sub>2</sub>

$$\zeta_{\text{EEQ}}^{\text{Lr,ref}} = 0.0890 e^{-}$$

$$\text{CN}^{\text{Lr}} = 1.6426$$

$$\alpha^{\text{Lr}}(i\omega^{\text{I}}) = \{84.5082, 70.8844, 54.6074, 36.7023, 26.9876, 20.8760, \\ 16.7762, 13.8910, 11.7750, 10.1664, 8.9060, 7.8928, \\ 6.3660, 5.2713, 4.4497, 3.8123, 3.3054, 2.4078, \\ 1.8307, 1.1565, 0.7938, 0.3873, 0.2286\}$$

#### C.4.15.4 LrH<sub>3</sub>

$$\zeta_{\text{EEQ}}^{\text{Lr,ref}} = 0.1191 e^{-}$$

$$\text{CN}^{\text{Lr}} = 2.4757$$

$$\alpha^{\text{Lr}}(i\omega^{\text{I}}) = \{47.5131, 46.1745, 42.8145, 34.3869, 27.1100, 21.6792, \\ 17.7219, 14.8051, 12.6061, 10.9063, 9.5606, 8.4723, \\ 6.8249, 5.6415, 4.7538, 4.0661, 3.5201, 2.5565, \\ 1.9394, 1.2216, 0.8370, 0.4074, 0.2401\}$$

#### C.4.15.5 LrH<sub>4</sub>

$$\zeta_{\text{EEQ}}^{\text{Lr,ref}} = 0.1409 e^{-}$$

$$\text{CN}^{\text{Lr}} = 3.2166$$

$$\alpha^{\text{Lr}}(i\omega^{\text{I}}) = \{242.4220, 51.7872, 46.2957, 36.7862, 29.2534, 23.5192, \\ 19.2598, 16.0852, 13.6785, 11.8139, 10.3373, 9.1439, \\ 7.3415, 6.0511, 5.0865, 4.3417, 3.7520, 2.7155, \\ 2.0549, 1.2901, 0.8821, 0.4281, 0.2519\}$$

#### C.4.15.6 LrH<sub>5</sub>

$$\zeta_{\text{EEQ}}^{\text{Lr,ref}} = 0.1574 e^{-}$$

$$\text{CN}^{\text{Lr}} = 3.9996$$

$$\alpha^{\text{Lr}}(i\omega^{\text{I}}) = \{143.6357, 96.0464, 68.6157, 45.5605, 33.9675, 26.5910, \\ 21.4849, 17.7938, 15.0382, 12.9231, 11.2596, 9.9227, \\ 7.9178, 6.4947, 5.4384, 4.6276, 3.9889, 2.8735, \\ 2.1677, 1.3559, 0.9251, 0.4478, 0.2631\}$$

#### C.4.15.7 LrH<sub>6</sub>

$$\zeta_{\text{EEQ}}^{\text{Lr,ref}} = 0.1708 e^{-}$$

$$\text{CN}^{\text{Lr}} = 4.7792$$

$$\alpha^{\text{Lr}}(i\omega^{\text{I}}) = \{176.3109, 122.3955, 83.0181, 51.6133, 37.3991, 28.8828, \\ 23.1675, 19.1031, 16.0971, 13.8031, 12.0055, 10.5648, \\ 8.4103, 6.8854, 5.7561, 4.8910, 4.2107, 3.0257, \\ 2.2783, 1.4216, 0.9685, 0.4678, 0.2746\}$$

## D EEQ

### D.1 AcQM

For the parameterization of the EEQ model, a set of actinide structures called AcQM was created. The set contains in total 2537 structures. The first part of 1283 structures contain realistic actinide complexes that were created using the Architector combined with our ArchitectorWrapper package, as described in our LnQM set. The structures were generated with only stable oxidation states of the central actinide with coordination numbers ranging from four to 10. The second part contains 1254 structures of smaller hydrides, fluorides, chlorides, oxides, and sulfides and various mindless structures with elements across the first five periods of the periodic table – all of those have coordination numbers ranging from one to 8. The AcQM set can be found on our GitHub (<https://github.com/grimme-lab/acqm>). For every structure, the system charge is given in the .CHRG file and the number of unpaired electrons in the.UHF file. The Hirshfeld population analysis partial charges are given in the hirshfeld.apc file.

### D.2 Loss Function

$$f_{\text{err}} = \underbrace{\frac{5}{4}(1 - |\rho_{\{q_{\text{EEQ}}\}, \{q_{\text{ref}}\}}|)}_{\text{Pearson corr. coeff.}} + \underbrace{\frac{3}{5} \frac{1}{n} \sum_{i=1}^n |e_i|}_{\text{MAE}} + \underbrace{\frac{1}{n} \sum_{i=1}^n e_i}_{\text{ME}} \quad (8)$$

### D.3 Parameters

**Table 2** Parameters for the EEQ model. The four parameters per element  $A$  include the atomic electronegativity  $EN_A$ , atomic hardness terms  $J_{AA}$ , element-specific scaling parameter  $\kappa_A$ , and atomic van der Waals radii  $a_A$ .

| Element $A$ | $EN_A$ | $J_{AA}$ | $\kappa_A$ | $a_A$  |
|-------------|--------|----------|------------|--------|
| Ac          | 1.0458 | -0.0007  | 0.0047     | 1.2226 |
| Th          | 1.0989 | -0.0017  | 0.0159     | 1.2874 |
| Pa          | 1.0721 | -0.0013  | 0.0037     | 1.4443 |
| U           | 1.0982 | -0.0010  | 0.0042     | 1.2903 |
| Np          | 1.1090 | -0.0009  | 0.0071     | 1.4101 |
| Pu          | 1.0104 | -0.0011  | 0.0049     | 1.2550 |
| Am          | 1.0010 | -0.0013  | 0.0051     | 1.1518 |
| Cm          | 1.1100 | -0.0010  | 0.0071     | 1.4201 |
| Bk          | 1.1683 | -0.0010  | 0.0046     | 1.4396 |
| Cf          | 1.0089 | -0.0010  | 0.0039     | 1.2857 |
| Es          | 1.0593 | -0.0011  | 0.0030     | 1.3502 |
| Fm          | 1.0767 | -0.0010  | 0.0040     | 1.3301 |
| Md          | 1.1131 | -0.0006  | 0.0055     | 1.3075 |
| No          | 1.1434 | -0.0001  | 0.0135     | 1.2653 |
| Lr          | 1.1371 | -0.0014  | 0.0068     | 1.3407 |

## E Relativistic effects

The influence of the relativistic effects on geometries and dynamic purely-imaginary frequency polarizabilities of the reference structures was investigated and is shown in the following for the actinium hydrides.

### E.1 Geometries

The geometries of  $\text{AcH}_{1-6}$  were optimized using ZORA PBE0/ZORA-def2-TZVP (SARC-ZORA-TZVP for actinium) and PBE0/def2-TZVP and compared. The resulting geometries deviate only marginally from each other.

It should be noted that  $\text{PaH}_2$ ,  $\text{NpH}_2$ , and  $\text{CfH}_4$  were optimized with ZORA corrections since the non-corrected DFT calculations resulted in highly symmetric structures that possessed desymmetrizing imaginary frequencies.

**Table 3** RMSD of  $\text{AcH}_{1-6}$  geometries obtained with (ZORA, PBE0/ZORA-def2-TZVP) and without (PBE0/def2-TZVP) relativistic corrections.

| Structure      | RMSD    |
|----------------|---------|
| $\text{AcH}$   | 0.00032 |
| $\text{AcH}_2$ | 0.00136 |
| $\text{AcH}_3$ | 0.00099 |
| $\text{AcH}_4$ | 0.00479 |
| $\text{AcH}_5$ | 0.00502 |
| $\text{AcH}_6$ | 0.00155 |



## E.2 Dynamic Purely-Imaginary Frequency Polarizabilities

For the calculation of the dynamic purely-imaginary frequency polarizabilities, the same procedure is used as described in the main manuscript. However, for the relativistic approach, ZORA using ZORA-def2-TZVP (SARC-ZORA-TZVP for the actinide) is used. We find only small deviations upon using relativistic corrections, which are negligible for the use in the D3 and D4 schemes.

**Table 4** Deviation of dynamic purely-imaginary frequency polarizabilities of  $\text{AcH}_{1-6}$  obtained with (PBE0/ZORA-def2-TZVP) and without (PBE0/def2-TZVP) relativistic corrections.

| $\omega^I$ | AcH   | AcH <sub>2</sub> | AcH <sub>3</sub> | AcH <sub>4</sub> | AcH <sub>5</sub> | AcH <sub>6</sub> |
|------------|-------|------------------|------------------|------------------|------------------|------------------|
| 0.000001   | 15.35 | 8.81             | 0.91             | 3.80             | 1.62             | 1.60             |
| 0.05       | 9.15  | 4.49             | 0.72             | 0.69             | 0.98             | 1.14             |
| 0.10       | 2.47  | 1.20             | 0.29             | 0.12             | 0.14             | 0.24             |
| 0.20       | -1.03 | -0.77            | -0.56            | -0.58            | -0.81            | -0.79            |
| 0.30       | -1.31 | -1.23            | -0.99            | -0.94            | -1.17            | -1.13            |
| 0.40       | -1.17 | -1.26            | -1.11            | -1.04            | -1.24            | -1.17            |
| 0.50       | -0.99 | -1.16            | -1.07            | -1.00            | -1.16            | -1.09            |
| 0.60       | -0.83 | -1.02            | -0.97            | -0.91            | -1.04            | -0.97            |
| 0.70       | -0.71 | -0.89            | -0.86            | -0.80            | -0.91            | -0.85            |
| 0.80       | -0.61 | -0.77            | -0.75            | -0.70            | -0.79            | -0.74            |
| 0.90       | -0.54 | -0.68            | -0.67            | -0.62            | -0.69            | -0.65            |
| 1.00       | -0.48 | -0.60            | -0.59            | -0.55            | -0.61            | -0.57            |
| 1.20       | -0.41 | -0.50            | -0.48            | -0.44            | -0.48            | -0.45            |
| 1.40       | -0.36 | -0.42            | -0.41            | -0.38            | -0.40            | -0.38            |
| 1.60       | -0.33 | -0.38            | -0.35            | -0.33            | -0.34            | -0.32            |
| 1.80       | -0.30 | -0.34            | -0.32            | -0.30            | -0.30            | -0.29            |
| 2.00       | -0.29 | -0.31            | -0.29            | -0.27            | -0.27            | -0.26            |
| 2.50       | -0.26 | -0.27            | -0.25            | -0.23            | -0.23            | -0.22            |
| 3.00       | -0.23 | -0.24            | -0.22            | -0.21            | -0.20            | -0.20            |
| 4.00       | -0.19 | -0.19            | -0.17            | -0.17            | -0.16            | -0.16            |
| 5.00       | -0.16 | -0.15            | -0.14            | -0.13            | -0.13            | -0.13            |
| 7.50       | -0.10 | -0.10            | -0.09            | -0.08            | -0.08            | -0.08            |
| 10.00      | -0.07 | -0.06            | -0.06            | -0.06            | -0.06            | -0.06            |
| ME         | 0.72  | 0.14             | -0.37            | -0.22            | -0.36            | -0.33            |
| MAE        | 1.62  | 1.12             | 0.53             | 0.62             | 0.60             | 0.59             |
| MAX        | 15.35 | 8.81             | 1.11             | 3.80             | 1.62             | 1.60             |

## F Mindless Structures in the AcQM

In the following, some examples of mindless structures in the AcQM are shown.

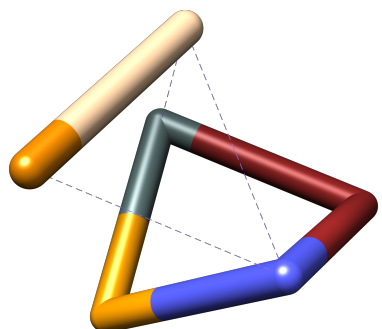

(a) AmSiSnSeTeBr<sup>2+</sup>

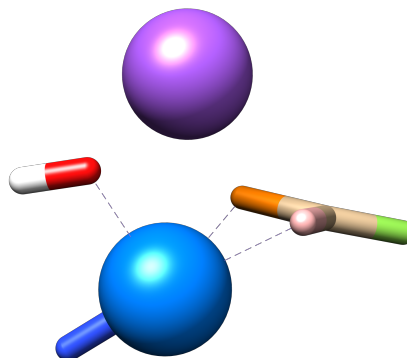

(b) NpNaBNPHOFC<sup>-</sup>

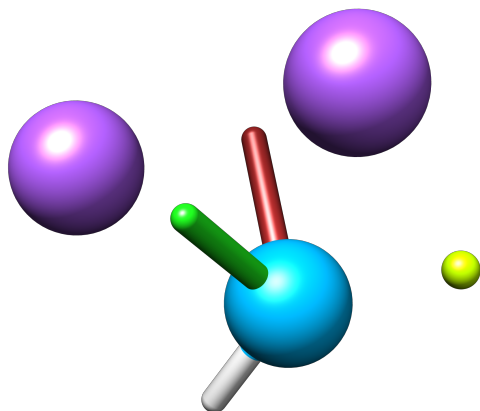

(c) ThNaBeClBrHNa<sup>+</sup>

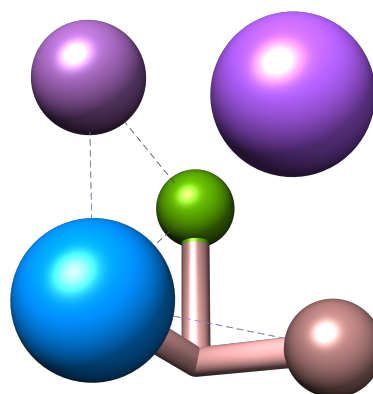

(d) UNaMgBInSb

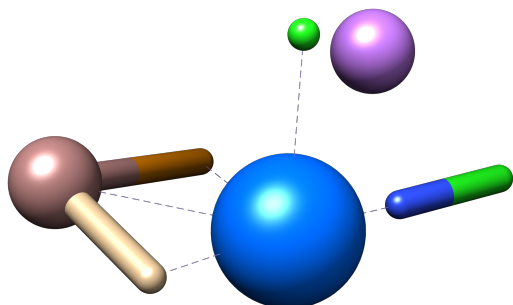

(e) PuInCNTeCl<sub>2</sub>Li<sup>+</sup>

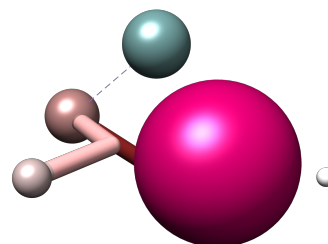

(f) LrHBAlInGeBr<sup>2+</sup>

**Fig. 1** Examples of mindless structures contained within the AcQM.
